# Supplementary material for: Synthesis of aminomethylated 4-fluoropiperidines and 3-fluoropyrrolidines
Source: Royal Society of Chemistry journal article supplement (doi:10.1039/c003380d), 2010-01-01

## SUPPORTING INFORMATION

for

### Synthesis of aminomethylated 4-fluoropiperidines and 3-fluoropyrrolidines

Guido Verniest,<sup>a,1</sup> Karel Piron,<sup>a</sup> Eva Van Hende,<sup>a</sup> Jan Willem Thuring,<sup>b</sup> Gregor Macdonald,<sup>b</sup>  
Frederik Deroose,<sup>b</sup> Norbert De Kimpe<sup>a,\*</sup>

<sup>a</sup> Department of Organic Chemistry, Faculty of Bioscience Engineering, Ghent University, Coupure Links 653, B-9000 Ghent, Belgium

<sup>b</sup> Johnson & Johnson, Pharmaceutical Research & Development, a Division of Janssen Pharmaceutica NV, Turnhoutseweg 30, B-2340 Beerse, Belgium

E-mail: norbert.dekimpe@ugent.be

#### Synthetic procedures and spectroscopic data for all new compounds 6 - 8, 10, 17 -20.

***tert*-Butyl 4-bromomethyl-4-fluoropiperidine-1-carboxylate (6).** To a solution of 1-*tert*-butyl 4-methylenepiperidine **5** (1.5 g, 7.6 mmol) in dry CH<sub>2</sub>Cl<sub>2</sub> (40 mL) was added Et<sub>3</sub>N.3HF (3.1 mL, 2.5 equiv) with a syringe at 0°C. Subsequently, NBS (2.03 g, 1.5 equiv) was added at 0°C and the mixture was stirred at room temperature for 3 h. After the reaction was completed, the mixture was poured in aq. 0.5 M NaOH (50 mL) and extracted with CH<sub>2</sub>Cl<sub>2</sub> (3 x 50 mL). The combined organic layers were washed twice with aq. 0.5 M NaOH and brine. After drying over MgSO<sub>4</sub> and filtration of the solids, the solvent was evaporated in vacuo, yielding 1-*tert*-butyl 4-bromomethyl-4-fluoropiperidine-1-carboxylate **6** (2.06 g), sufficiently pure for further use in the next step. Yield: 92%. Colourless oil. <sup>1</sup>H NMR (300 MHz, CDCl<sub>3</sub>): δ 1.46 (9H, s), 1.49-1.77 (2H, m), 1.91-2.01 (2H, m), 3.06 (2H, t(br), J = 12.1 Hz), 3.46 (2H, d, J = 17.6 Hz), 3.99 (2H, s(br)). <sup>13</sup>C NMR (75 MHz, CDCl<sub>3</sub>): δ 28.5, 33.4 (d, J = 20.8 Hz), 38.8 (d, J = 25.4 Hz), 39.4, 79.9, 91.6 (d, J = 177.7 Hz), 154.6. <sup>19</sup>F NMR (282 MHz, CDCl<sub>3</sub>): δ -162.4 (1F, m). IR (ATR, cm<sup>-1</sup>): ν 1683, 1420, 1366, 1246. GC-MS (EI): m/z (%): 295/297 (M<sup>+</sup>, 2), 240 (34), 222 (24), 194/196 (9), 177 (11), 116 (12), 96 (26), 57 (100). Anal. Calcd. for C<sub>11</sub>H<sub>19</sub>BrFNO<sub>2</sub>: C: 44.61; H: 6.47; N: 4.73. Found: C: 45.20; H: 7.01; N: 4.35.

***tert*-Butyl 4-azidomethyl-4-fluoropiperidine-1-carboxylate (7).** To a solution of piperidine **6** (1.27 g, 4.3 mmol) in DMSO (10 mL) was added NaN<sub>3</sub> (0.33 g, 5 mmol, 1.2 equiv) and NaI (0.76 g, 5 mmol, 1.2 equiv). The solution was heated to 130°C for 16 h and after cooling to room temperature, the reaction mixture was poured in water (10 mL) and extracted with CH<sub>2</sub>Cl<sub>2</sub> (3 x 10 mL). The combined organic layers were washed with brine and dried over MgSO<sub>4</sub>. After filtration of the solids and evaporation of the solvents under reduced pressure, the resulting oil was subjected to flash silica gel chromatography (EtOAc/hexane 1:9) to give piperidine **7** (1.0 g) as a colourless oil. Yield 91%. <sup>1</sup>H NMR (300 MHz, CDCl<sub>3</sub>): δ 1.46 (9H, s), 1.47-1.67 (2H, m), 1.84-1.97 (2H, m), 3.08 (2H, t(br), J = 12.4 Hz), 3.32 (2H, d, J = 20.4 Hz), 3.96 (2H, s(br)). <sup>13</sup>C NMR (75 MHz, CDCl<sub>3</sub>): δ 28.7, 32.5 (d, J = 20.8 Hz), 39.4 (s(br)), 58.5 (d, J = 23.1 Hz), 80.1, 94.1 (d, J = 175.4 Hz), 154.8. <sup>19</sup>F NMR (282 MHz, CDCl<sub>3</sub>): δ -160.9 (1F, m). IR (ATR, cm<sup>-1</sup>): ν 2923, 2102, 1701, 1465, 1156. LC-MS (ES+): m/z (%): 244 (M+H<sup>+</sup>-CH<sub>3</sub>, 100).

***tert*-Butyl 4-aminomethyl-4-fluoropiperidine-1-carboxylate (8).** To a solution of 4-azidomethyl-4-fluoropiperidine **7** (0.25 g, 0.97 mmol) in freshly distilled methanol (3 mL) was added Pd/C (0.05 g, 20 w%). The solution was stirred at room temperature under hydrogen atmosphere (4.6 bar). After reaction for 16 h, the solution was filtered and the solids were washed with diethyl ether. After evaporation of the solvent of the filtrate, the crude mixture was redissolved in 5 mL of diethyl ether and extracted with aq. 2M HCl (3 x 5 mL). The combined aqueous layers were neutralized to pH 7 using aq. 2M NaOH and extracted with EtOAc (3 x 10 mL). After drying of the extract over MgSO<sub>4</sub>, filtration and evaporation of the solvent, 4-aminomethyl-4-fluoropiperidine **8** (0.15 g) was obtained as a colourless oil. Yield 67%. <sup>1</sup>H NMR (300 MHz, CDCl<sub>3</sub>): δ 1.46 (9H, s), 1.47-1.69 (2H, m), 1.82-1.90 (2H, m), 2.79 (2H, d, J = 20.4 Hz), 3.08 (2H, t(br), J = 12.1 Hz), 3.94 (2H, s(br)). <sup>13</sup>C NMR (75 MHz, CDCl<sub>3</sub>): δ 28.6, 32.4 (d, J = 20.8 Hz), 39.7 (s(br)), 50.6 (d, J = 23.1 Hz), 79.8, 94.5 (d, J = 170.8 Hz), 154.9. <sup>19</sup>F NMR (282 MHz, CDCl<sub>3</sub>): δ -170.8 to -170.4 (1F, m). IR (NaCl, cm<sup>-1</sup>): ν 3400, 1690, 1423, 1158. GC-MS (EI): m/z (%): 232 (M<sup>+</sup>, 1), 175 (9), 159 (23), 155 (34), 111 (18), 96 (13), 82 (15), 70 (16), 57 (100). Anal. Calcd. for C<sub>11</sub>H<sub>21</sub>FN<sub>2</sub>O<sub>2</sub>: C: 56.87; H: 9.11; N: 12.06. Found: C: 57.40; H: 9.69; N: 12.32.

**1-*t*-Butoxycarbonyl-4-cyano-4-fluoropiperidine (10).** In a dry bulb of 25 mL provided with a Claisen connecting tube under nitrogen atmosphere, a solution of 1-*t*-butoxycarbonyl-3-cyanopiperidine **9** (0.21 g, 1 mmol) and diisopropylamine (0.12 g, 1.2 mmol, 1.2 equiv) in dry THF (10 mL) was stirred at 0°C. After 1 minute, BuLi (0.5 mL of a

2.5 M solution in hexane, 1.2 equiv) was added with a syringe. The solution was stirred during 45 minutes, and NFSI (0.38 g, 1.2 mmol, 1.2 equiv, dissolved in 5 mL of THF) was added with a syringe, still at 0°C. After stirring for 2 h while the temperature had risen till room temperature, the mixture was poured in H<sub>2</sub>O (15 mL) and extraction was performed with diethyl ether (3 x 10 mL). The combined organic fractions were washed with brine followed by 0.5 M NaOH, and after drying (MgSO<sub>4</sub>), filtration and evaporation of the solvent, the crude 1-*t*-butoxycarbonyl-4-cyano-4-fluoropiperidine **10** was obtained. Purification was performed using column chromatography on silica gel, yielding white crystals (0.05 g). Flash chromatography (hexane/EtOAc 90:10, R<sub>f</sub> = 0.34). Yield: 22%. Mp 74.6 – 76.1°C. <sup>1</sup>H NMR (300 MHz, CDCl<sub>3</sub>): δ 1.47 (9H, s, C(CH<sub>3</sub>)<sub>3</sub>); 1.98-2.21 (4H, m, (CH<sub>2</sub>)<sub>2</sub>CF); 3.58 (4H, t, J = 5.8 Hz, (CH<sub>2</sub>)<sub>2</sub>N). <sup>13</sup>C NMR (75 MHz, CDCl<sub>3</sub>): δ 28.3 (3 x CCH<sub>3</sub>); 34.8 (d, J = 20.8 Hz, (CH<sub>2</sub>)<sub>2</sub>CF); 32.3 (s (br), (CH<sub>2</sub>)<sub>2</sub>N); 80.6 (C(CH<sub>3</sub>)<sub>3</sub>); 86.4 (d, J = 184.6 Hz, CF); 117.4 (d, J = 34.6 Hz, CN); 128.4 and 129.8 (2 x CH<sub>2</sub>N); 154.2 (C=O). <sup>19</sup>F NMR (282 MHz, CDCl<sub>3</sub>): δ -153.33 (s(br)). IR (KBr, cm<sup>-1</sup>): ν 3256; 1679 (C=O); 1429. GC-MS (EI): m/z (%): 228 (M<sup>+</sup>, 1); 173 (15); 155 (45); 128 (16); 57 (100); 41(25). Anal. Calcd. for C<sub>11</sub>H<sub>17</sub>FN<sub>2</sub>O<sub>2</sub>: C: 57.9; H: 7.5; N: 12.3. Found: C: 58.6; H: 7.9; N: 12.0.

**3-Bromomethyl-1-*tert*-butoxycarbonyl-3-fluoropyrrolidine (17).** The synthetic procedure for compound **17** is analogous to the synthesis of compound **6**. Purification was performed by flash silica gel chromatography (hexane/ethyl acetate: 75/25; R<sub>f</sub>: 0.29). Yield: 68%. Light yellow oil. <sup>1</sup>H NMR (300 MHz, CDCl<sub>3</sub>): δ 1.45 (9H, s, C(CH<sub>3</sub>)<sub>3</sub>); 1.94-2.30 (2H, m, NCH<sub>2</sub>CH<sub>2</sub>); 3.41-3.81 (6H, m, CH<sub>2</sub>NCH<sub>2</sub>CFCH<sub>2</sub>Br). <sup>19</sup>F NMR (282 MHz, CDCl<sub>3</sub>): δ -149.48 to -150.33 (1F, m). <sup>13</sup>C NMR (75 MHz, CDCl<sub>3</sub>): δ 27.9, 33.5 (d, J = 28.8 Hz), 34.2 and 34.9 (d, J = 22.5 Hz),\* 44.0 and 44.4,\* 54.4 and 54.6 (d, J = 23.1 Hz),\* 79.2, 99.6 and 100.4 (d, J = 182.9 Hz),\* 153.5 and 153.6.\* [\* Different signals due to *N*-Boc rotamers]. IR (ATR, cm<sup>-1</sup>): ν 1688; 1402; 1365; 1169; 1147; 1119. MS (ES<sup>+</sup>): m/z (%): 267/269 (M+H<sup>+</sup>-CH<sub>3</sub>, 100); 226/228 (45). Anal. Calcd. for C<sub>10</sub>H<sub>17</sub>BrFNO<sub>2</sub>: C: 42.57; H: 6.07; N: 4.96. Found: C: 43.22; H: 6.41; N: 4.68.

**3-Acetoxymethyl-1-*tert*-butoxycarbonyl-3-fluoropyrrolidine (18).** To a solution of 3-bromomethyl-1-*tert*-butoxycarbonyl-3-fluoropyrrolidine **17** (1.20 g, 4.25 mmol) in dry DMF (15 mL) was added NaOAc (0.70 g, 8.53 mmol; 2 equiv) and sodium iodide (0.13 g, 0.87 mmol; 0.2 equiv). After heating at 120°C under stirring for 48 h, the reaction mixture was cooled down and poured in 35 mL of water. The mixture was extracted with diethyl ether (3 x 20 mL) and the extracts were washed with brine (3 x 20 mL) and dried over MgSO<sub>4</sub>.

After filtration and evaporation of the solvent, 3-acetoxymethyl-3-fluoro-1-*tert*-butoxycarbonylpyrrolidine **18** (0.90 g, 3.44 mmol) was obtained as a yellow oil. Yield: 81%. A sample of compound **18** was purified for analytical purposes via flash silica gel chromatography (hexane/ethyl acetate: 85/15. Rf: 0.07). <sup>1</sup>H NMR (300 MHz, CDCl<sub>3</sub>): δ 1.39 (9H, s), 1.78-2.17 (2H, m), 2.03 (3H, s, rotamer 1), 2.05 (3H, s, rotamer 2), 3.28-3.68 (4H, m), 4.11-4.30 (2H, m). <sup>19</sup>F NMR (282 MHz, CDCl<sub>3</sub>): δ -156.06 to -156.74 (1F, m). <sup>13</sup>C NMR (75 MHz, CDCl<sub>3</sub>): δ 20.5, 28.2, 32.7 and 33.5 (d, J = 23.1 Hz),\* 43.7 and 44.1,\* 53.1 and 53.4 (d, J = 24.8 Hz),\* 55.1 (d, J = 25.4 Hz), 79.6, 99.8 and 100.6 (d, J = 180.6 Hz),\* 153.9 and 154.0,\* 170.2. [\* Different signals due to *N*-Boc rotamers]. IR (ATR, cm<sup>-1</sup>): ν 1748; 1694; 1407; 1366; 1235; 1164. GC-MS (EI): m/z (%): 261 (M<sup>+</sup>, 0.6); 206 (18); 188 (39); 146 (22); 102 (23); 57 (C<sub>4</sub>H<sub>9</sub><sup>+</sup>, 100); 43 (29). Anal. Calcd. for C<sub>12</sub>H<sub>20</sub>FNO<sub>4</sub>: C: 55.16; H: 7.72; N: 5.36. Found: C: 55.53; H: 8.11; N: 4.99.

**3-Azidomethyl-1-*tert*-butoxycarbonyl-3-fluoropyrrolidine (19).** To a solution of 3-bromomethyl-1-*tert*-butoxycarbonyl-3-fluoropyrrolidine **17** (3.40 g, 12.05 mmol) in dimethylsulfoxide (50 mL) was added sodium azide (0.94 g, 14.46 mmol; 1.2 equiv) and sodium iodide (2.17 g, 14.46 mmol; 1.2 equiv). After stirring for 2.5 h at 130°C, the reaction mixture was cooled down, poured in 50 mL of water, and extracted with CH<sub>2</sub>Cl<sub>2</sub> (3 x 20 mL). After washing with brine (3 x 20 mL), drying over MgSO<sub>4</sub>, filtration and evaporation of the solvent, 3-azidomethyl-1-*tert*-butoxycarbonyl-3-fluoropyrrolidine **19** (2.35 g, 9.62 mmol) was obtained as a yellow oil. Yield: 80%. <sup>1</sup>H NMR (300 MHz, CDCl<sub>3</sub>): δ 1.47 (9H, s), 1.83-2.28 (2H, m), 3.34-3.77 (6H, m). <sup>19</sup>F NMR (282 MHz, CDCl<sub>3</sub>): δ -153.10 to -153.74 (1F, m). <sup>13</sup>C NMR (75 MHz, CDCl<sub>3</sub>): δ 28.2, 33.3 and 33.9 (d, J = 23.1 Hz),\* 43.8 and 44.2,\* 53.0 and 53.8 (d, J = 25.4 Hz),\* 54.6 (d, J = 25.4), 79.6, 101.4 and 102.3 (d, J = 181.2 Hz),\* 153.9. [\* Different signals due to *N*-Boc rotamers]. IR (ATR, cm<sup>-1</sup>): ν 2102; 1686; 1403; 1365; 1156; 1123. MS (ES<sup>+</sup>): m/z (%): 230 (M+H<sup>+</sup>-CH<sub>3</sub>, 100); 189 (55).

***tert*-Butyl 4-aminomethyl-4-fluoropyrrolidine-1-carboxylate (20a).** The synthesis of pyrrolidine **20a** from 3-methylenepyrrolidine **16** proceeds analogous to the synthesis of piperidine **8** starting from 4-methylenepiperidine **5**. Pyrrolidine **20a** occurred as a yellow oil. <sup>1</sup>H NMR (300 MHz, CDCl<sub>3</sub>): δ 1.47 (9H, s), 1.66 (2H, s(br)), 1.77-2.23 (2H, m), 2.91-3.09 (2H, m), 3.32-3.73 (4H, m). <sup>13</sup>C NMR (75 MHz, CDCl<sub>3</sub>): δ 28.3, 33.2 and 33.9 (d, J = 23.1 Hz),\* 44.0 and 44.5,\* 46.7 (d, J = 25.4 Hz), 53.8 and 54.1 (d, J = 28.9 Hz),\* 79.5, 103.1 and 104.0 (d, J = 176.0 Hz),\* 154.2. <sup>19</sup>F NMR (282 MHz, CDCl<sub>3</sub>): δ -157.6 to -158.4 (1F, m). [\* Different signals due to *N*-Boc rotamers]. IR (ATR, cm<sup>-1</sup>): ν 3379, 1686, 1406, 1365, 1169,

1117. GC-MS (EI):  $m/z$  (%): 198 ( $M^+$ -HF, 4), 145 ( $M^+$ -C(CH<sub>3</sub>)<sub>3</sub>, 40), 142 ( $M^+$ -F-C(CH<sub>3</sub>)<sub>3</sub>, 59), 125 (37), 57 (100). Anal. Calcd. for C<sub>10</sub>H<sub>19</sub>FN<sub>2</sub>O<sub>2</sub>: C: 55.03; H: 8.77; N: 12.83. Found: C: 55.10; H: 9.31; N: 12.65.

**3-(*N*-Acetyl)aminomethyl-1-*tert*-butoxycarbonyl-3-fluoropyrrolidine (20b).** 3-aminomethyl-1-*tert*-butoxycarbonyl-3-fluoropyrrolidine **20a** (0.10 g, 0.46 mmol) was dissolved in acetic anhydride (2 mL). After stirring for 16 h, the excess of acetic anhydride was evaporated yielding 3-(*N*-acetyl)aminomethyl-1-*tert*-butoxycarbonyl-3-fluoropyrrolidine **20b** (0.11 g, 0.42 mmol). Yield: 91%. <sup>1</sup>H NMR (300 MHz, CDCl<sub>3</sub>):  $\delta$  1.46 (9H, s), 1.88-2.20 (2H, m), 2.03 (3H, s, rotamer 1), 2.05 (3H, s, rotamer 2), 3.32-3.68 (6H, m), 6.52 (1H, s(br)). <sup>19</sup>F NMR (282 MHz, CDCl<sub>3</sub>):  $\delta$  -153.70 to -154.45 (1F, m). <sup>13</sup>C NMR (75 MHz, CDCl<sub>3</sub>):  $\delta$  22.9, 28.3, 33.3 and 34.0 (d,  $J$  = 21.9 Hz),\* 43.3 (d,  $J$  = 23.1 Hz), 43.9 and 44.4,\* 53.7 and 54.0 (d,  $J$  = 26.6 Hz),\* 79.7, 102.1 and 103.0 (d,  $J$  = 177.7 Hz),\* 154.1 and 154.2,\* 170.5. [\* Different signals due to *N*-Boc rotamers]. IR (ATR, cm<sup>-1</sup>):  $\nu$  3307; 1661; 1407; 1366; 1162; 1130; 730. MS (ES<sup>+</sup>):  $m/z$  (%): 205 (88); 189 ( $M+2H^+$ -OC(CH<sub>3</sub>)<sub>3</sub>, 100). Anal. Calcd. for C<sub>12</sub>H<sub>21</sub>FN<sub>2</sub>O<sub>3</sub>: C: 55.37; H: 8.13; N: 10.76. Found: C: 55.04; H: 8.52; N: 10.37.

**3-(*N*-Benzyloxycarbonyl)aminomethyl-1-*tert*-butoxycarbonyl-3-fluoropyrrolidine (20c).** To a solution of 3-aminomethyl-1-*tert*-butoxycarbonyl-3-fluoropyrrolidine **20a** (100 mg, 0.46 mmol) in dry THF (5 mL) was added benzyl chloroformate (78 mg, 0.46 mmol, 1 equiv) at 0°C. After stirring for 4.5 h at rt, the reaction mixture was poured in aq. 1 M NaOH (5 mL) and extracted with ethyl acetate (3 x 5 mL). The combined organic extracts were dried over MgSO<sub>4</sub>, filtered and the solvent was evaporated *in vacuo* yielding 3-(*N*-benzyloxycarbonyl)aminomethyl-1-*tert*-butoxycarbonyl-3-fluoropyrrolidine **20c** as a yellow oil. Yield: 62%. <sup>1</sup>H NMR (300 MHz, CDCl<sub>3</sub>):  $\delta$  1.46 (9H, s), 1.86-2.18 (2H, m), 3.31-3.71 (6H, m), 5.12 (2H, s(br)), 5.25 (1H, s(br)), 7.32-7.40 (5H, m). <sup>19</sup>F NMR (282 MHz, CDCl<sub>3</sub>):  $\delta$  -154.46 to -155.28 (1F, m). <sup>13</sup>C NMR (75 MHz, CDCl<sub>3</sub>):  $\delta$  28.4, 33.3 and 33.9 (d,  $J$  = 22.5 Hz),\* 43.9 and 44.4,\* 45.3 (d,  $J$  = 23.1 Hz), 53.6 and 53.9 (d,  $J$  = 26.0 Hz),\* 67.0, 79.7, 102.0 and 102.9 (d,  $J$  = 178.8 Hz),\* 128.1 (2 x CH<sub>arom</sub>), 128.2, 128.5 (2 x CH<sub>arom</sub>), 136.1, 154.15, 156.5. [\* Different signals due to *N*-Boc rotamers]. IR (ATR, cm<sup>-1</sup>):  $\nu$  3319; 1681; 1409; 1366; 1253; 1154; 1134; 731. MS (ES<sup>-</sup>): 351 ( $M-H^+$ , 100). Anal. Calcd. for C<sub>18</sub>H<sub>25</sub>FN<sub>2</sub>O<sub>4</sub>: C: 61.35; H: 7.15; N: 7.95. Found: C: 61.49; H: 7.57; N: 7.44.

**3-(*N*-Acetyl)aminomethyl-1-benzyl-3-fluoropyrrolidine (20d).** To a solution of 3-(*N*-acetyl)aminomethyl-3-fluoropyrrolidiniumtrifluoroacetate (0.50 g, 1.82 mmol) and triethylamine (1 mL, 7.28 mmol, 4 equiv) in CH<sub>2</sub>Cl<sub>2</sub> (25 mL) was added benzyl bromide (0.27

mL, 2.18 mmol, 1.2 equiv). After stirring at rt for 5h, the mixture was poured in aq. sat.  $\text{Na}_2\text{CO}_3$  (50 mL) and extracted with dichloromethane (3 x 10 mL). After drying over  $\text{MgSO}_4$ , filtration and evaporation of the solvent, the obtained crude oil was purified via flash silica gel chromatography ( $\text{CH}_2\text{Cl}_2/\text{MeOH}$ : 95/5; Rf: 0,18) yielding 3-(*N*-acetyl)aminomethyl-1-benzyl-3-fluoropyrrolidine **20d** (0.18 g, 0.72 mmol) as a yellow oil. Yield: 40%.  $^1\text{H}$  NMR (300 MHz,  $\text{CDCl}_3$ ):  $\delta$  1.92, 1.84-2.13 (2H, m), 2.46-2.83 (4H, m), 3.49 (2H, dd,  $J_1 = 22.0$  Hz,  $J_2 = 6.1$  Hz), 3.53 (1H, d,  $J = 13.0$  Hz), 3.61 (1H, d,  $J = 13.0$  Hz), 6.02 (1H, s, NH), 7.15-7.25 (5H, m).  $^{19}\text{F}$  NMR (282 MHz,  $\text{CDCl}_3$ ):  $\delta$  -142.51 to -143.03 (1F, septet,  $J = 24.1$  Hz).  $^{13}\text{C}$  NMR (75 MHz,  $\text{CDCl}_3$ ):  $\delta$  23.1, 34.9 (d,  $J = 23.0$  Hz), 45.3 (d,  $J = 24.2$  Hz), 52.5, 59.8, 62.1 (d,  $J = 24.3$  Hz), 103.3 (d,  $J = 178.8$  Hz), 127.1, 128.3 (2 x  $\text{CH}_{\text{arom}}$ ), 128.6 (2 x  $\text{CH}_{\text{arom}}$ ), 137.9, 170.4. IR (ATR,  $\text{cm}^{-1}$ ):  $\nu$  3286; 1652; 1553; 1376; 1111; 736; 699. GC-MS (EI):  $m/z$  (%): 249 ( $\text{M}^+$ , 1.4), 230 (69), 172 (77), 158 (30), 91 ( $\text{C}_7\text{H}_7^+$ , 100). Anal. Calcd. for  $\text{C}_{14}\text{H}_{19}\text{FN}_2\text{O}$ : C: 67.18; H: 7.65; N: 11.19. Found: C: 67.75; H: 8.00; N: 11.04.

**3-Ammoniomethyl-3-fluoropyrrolidinium bis(trifluoroacetate) 20e.** To a solution of *tert*-butyl 3-aminomethyl-3-fluoropyrrolidine-1-carboxylate **20a** (0.62 g) in  $\text{CH}_2\text{Cl}_2$  (25 mL) was added trifluoroacetic acid (4.35 mL, 56.8 mmol, 20 equiv) at  $0^\circ\text{C}$ . After stirring the mixture under dry atmosphere for 7 h at  $0^\circ\text{C}$ , the solvent and the excess of TFA was evaporated under reduced pressure. The obtained residue was recrystallized from EtOH to yield 3-ammoniomethyl-3-fluoropyrrolidinium bis(trifluoroacetate) **20e** (0.51 g). Yield: (52%). Mp  $169^\circ\text{C}$ .  $^1\text{H}$  NMR (300 MHz,  $\text{D}_2\text{O}$ ):  $\delta$  2.25 (1H, ddt,  $J = 36.9$  Hz,  $J = 14.9$  Hz,  $J = 10.0$  Hz), 2.42-2.58 (1H, m), 3.40-3.65 (5H, m), 3.74 (1H, ddd,  $J = 18.2$  Hz,  $J = 13.8$  Hz,  $J = 2.2$  Hz).  $^{13}\text{C}$  NMR (75 MHz,  $\text{D}_2\text{O}$ ):  $\delta$  33.3 (d,  $J = 23.1$  Hz), 42.2 (d,  $J = 23.1$  Hz), 44.3, 52.5 (d,  $J = 25.4$  Hz), 100.0 (d,  $J = 181.1$  Hz), 116.5 (q,  $J = 291.9$  Hz), 163.1 (q,  $J = 35.8$  Hz).  $^{19}\text{F}$  NMR (282 MHz,  $\text{D}_2\text{O}$ ):  $\delta$  -75.4 (6F, s), -154.6 to -155.0 (1F, m). IR (ATR,  $\text{cm}^{-1}$ ):  $\nu$  3024, 1667, 1186, 1145, 1126. MS (ES+):  $m/z$  (%): 433 (100); 199 ( $\text{M}+\text{H}^+$ , 20). Anal. Calcd. for  $\text{C}_9\text{H}_{13}\text{F}_7\text{N}_2\text{O}_4$ , C: 31.2%; H: 3.8%; N: 8.1%. Found C: 31.0%, H: 3.3%; N: 7.8%.

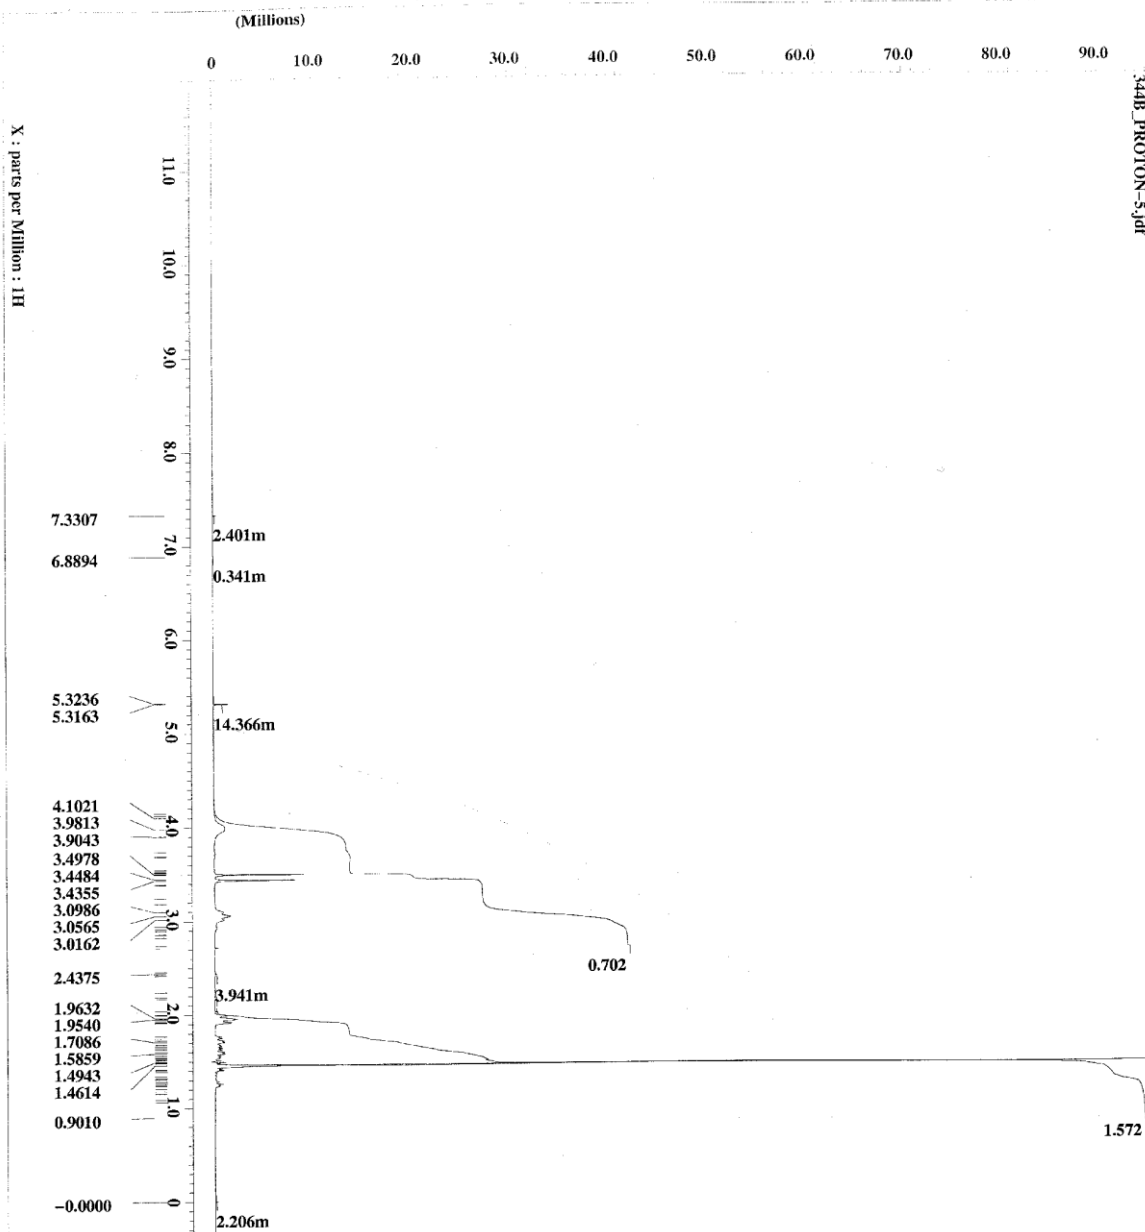

```

File Name      = 344B_PROTON-5.jdf
Author         = delta3
Experiment     = single_pulse.exp
Sample ID      = EVA/344B
Solvent        = CHLOROFORM-D
Creation Time   = 27-MAR-2008 05:43:05
Revision Time   = 27-MAR-2008 05:44:44
Current Time    = 27-MAR-2008 05:44:44

Data Format     = 1D COMPLEX
Data Size      = 8192
Data Title     = 1H
Data Units     = [ppm]
Dimensions     = X
Site           = Eclipse+ 300
Spectrometer   = DELTA_NMR

Field Strength = 7.0586013 [T] (300 MHz)
Acq Duration   = 1.8169856 [s]
F2 Domain      = 1H
F2 Freq        = 300.5296552 [MHz]
F2 Offset      = 5 [ppm]
F2 Spin        = 8192
X Prescans     = 0
X Resolution   = 0.55036209 [Hz]
X Sweep        = 4.50856628 [kHz]
Mod Return     = FALSE
Clipped        = 1
Scans          = 16
Total Scans    = 16

X 90 Width     = 11.3 [us]
X Acq Time     = 1.8169856 [s]
X Angle        = 90 [deg]
X Pulse Width  = 11.3 [us]
X Delay        = 1.5 [us]
Phase Preset   = 3 [us]
Recvr Gain     = 6 [us]
Relaxation Delay = 5 [s]
Temp Get       = 18.9 [deg]
Unblank Time   = 2 [us]

```

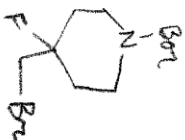

File : C:\MSDCHEM\1\DATA\EVH344b.D  
Operator : AA  
Acquired : 28 Mar 2008 16:31 using AcqMethod Synthese.M  
Instrument : Instrument #1  
Sample Name :  
Misc Info :  
Vial Number: 14

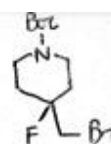

295/97

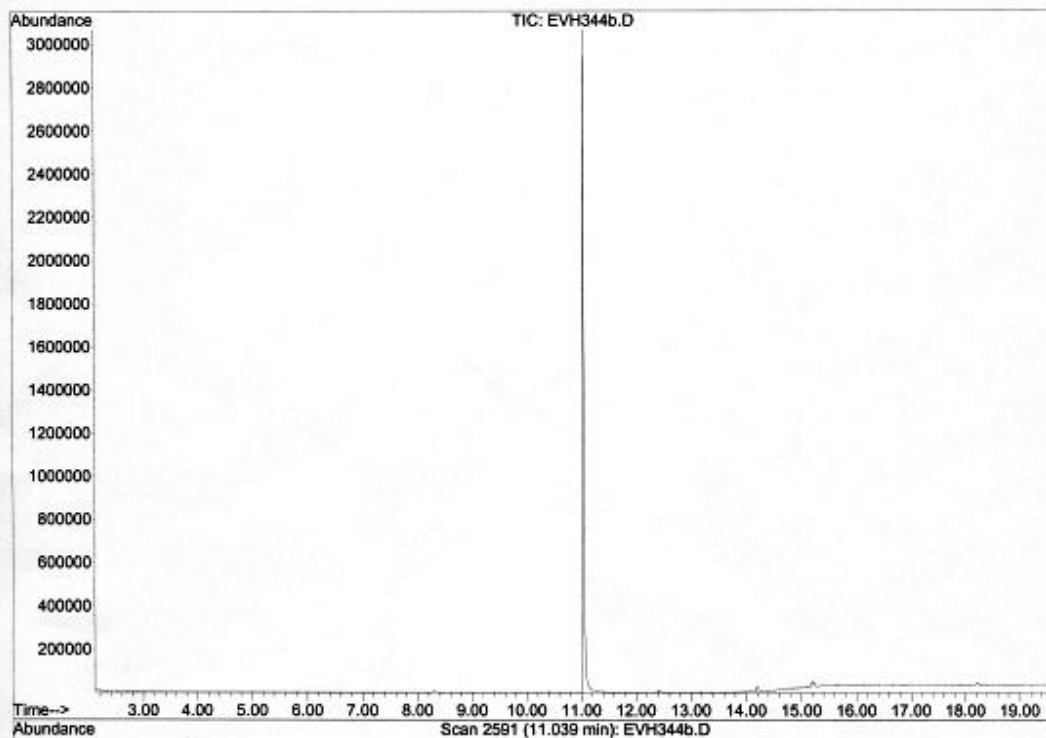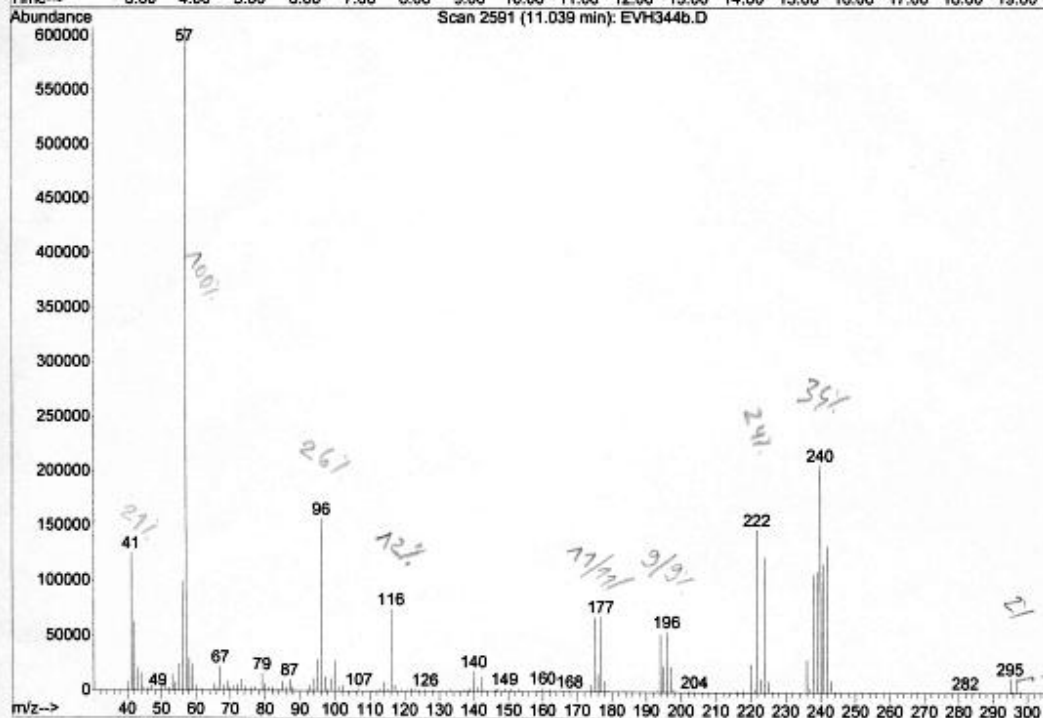



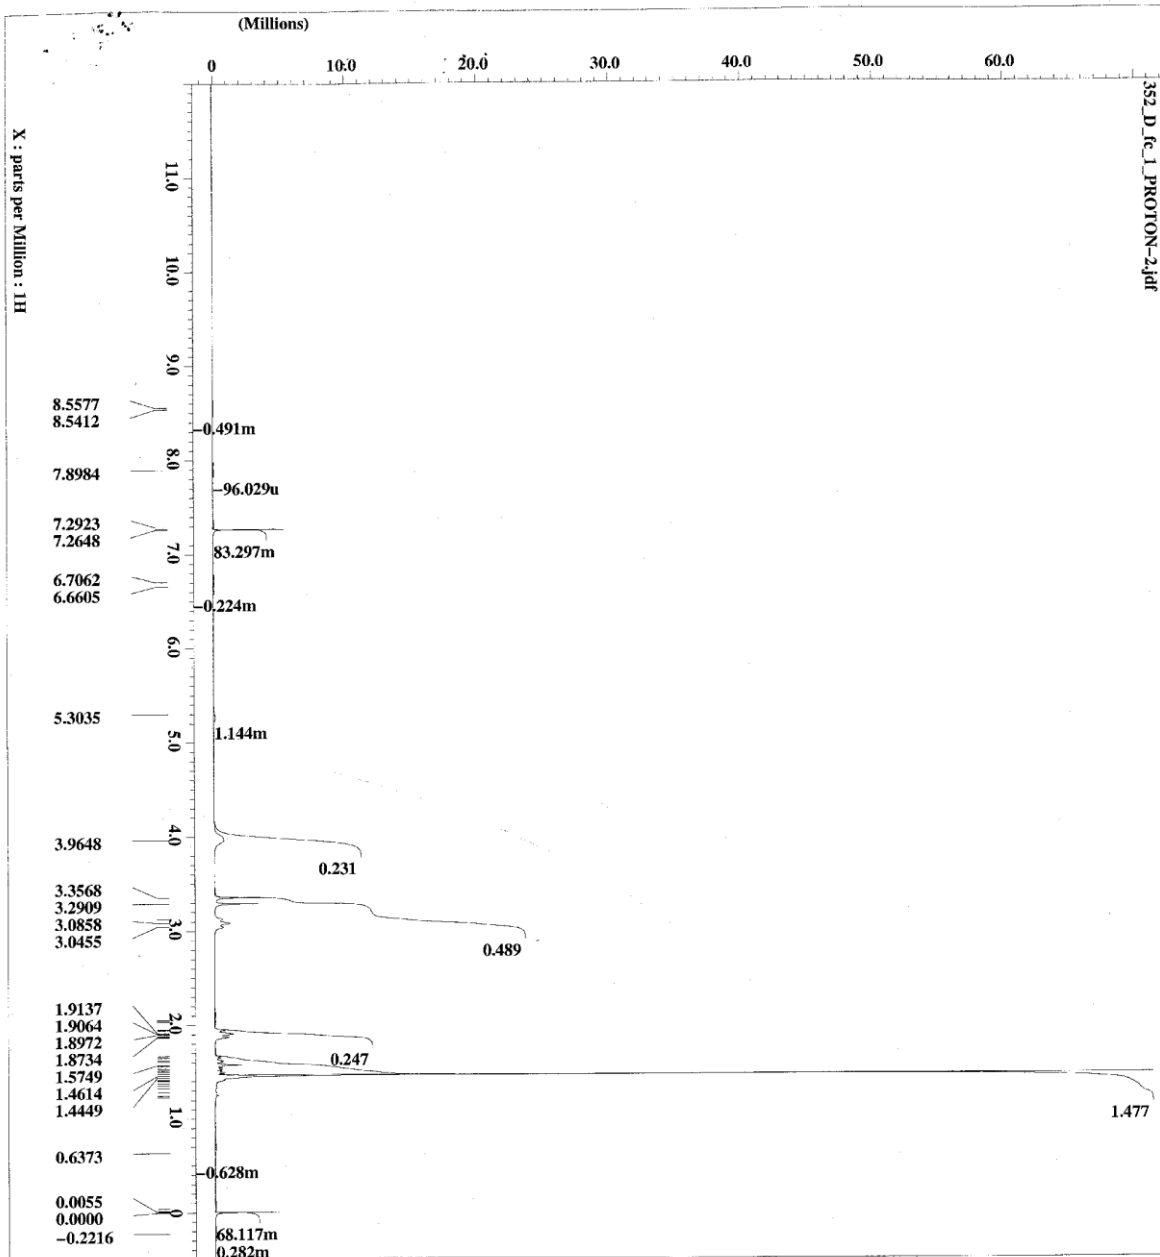

Filename = 352.D\_fc\_1\_PROTON-2.j  
 Subsys =  
 Acquisition =  
 Sample id = EKH/352.D\_fc\_1  
 Solvent = CHLOROFORM-D  
 Creation time = 28-APR-2008 15:10:14  
 Revision time = 28-APR-2008 15:40:03  
 Current time = 28-APR-2008 15:40:03

Data format = 1D COMPLEX  
 Dim size = 8192  
 Dim title = 1H  
 Dim units = [ppm]  
 Dimensions =  
 Site = X  
 Spectrometer = KSL100-300  
 Field strength = 7.058603 [T] (300) [MHz]  
 X acq duration = 1.8169856 [s]  
 X domain = 1H  
 X freq = 300.5295592 [MHz]  
 X offset = 8192  
 X points = 512  
 X prescans = 0  
 X resolution = 0.55036209 [Hz]  
 X sweep = 4.5085628 [kHz]  
 Clipped = FALSE  
 Mod return = 1  
 Scans = 16  
 Total scans = 16

X 90 width = 11.3 [us]  
 X acq time = 1.8169856 [s]  
 X angle = 90 [deg]  
 X pulse = 11.3 [us]  
 Initial wait = 1 [s]  
 Phase preset = 3 [us]  
 Recv. gain = 16  
 Relaxation delay = 5 [s]  
 Temp get = 21.1 [C]  
 Unblank time = 2 [us]

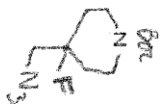

**JEOL**

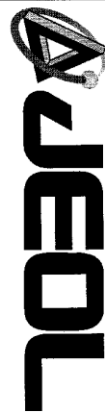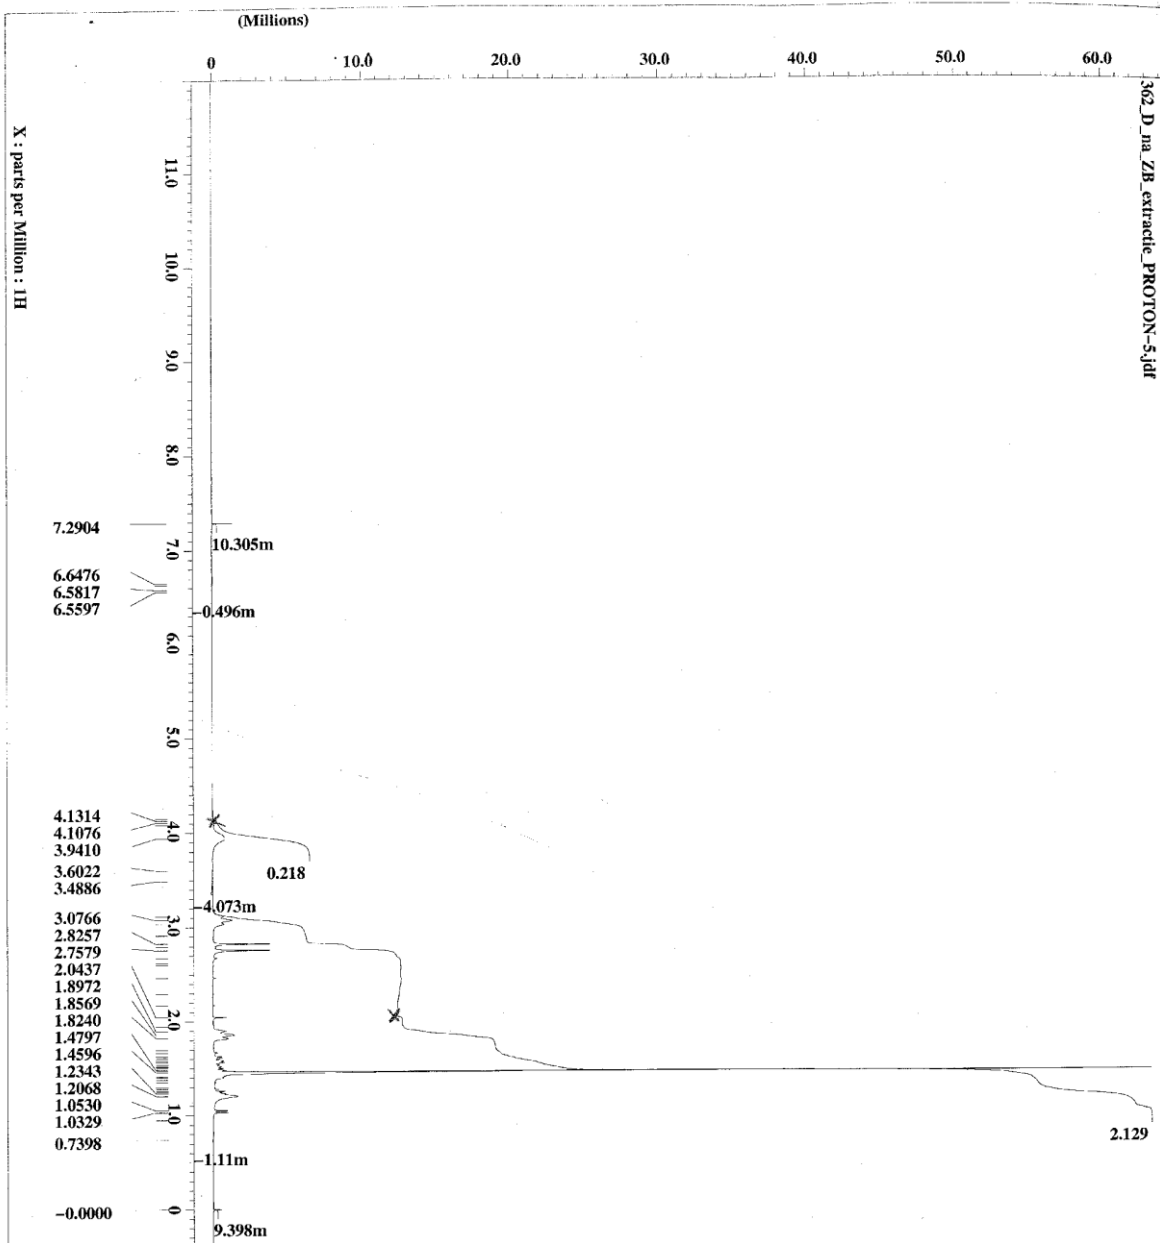

Filename = 362.D na ZB\_extracte  
Author = G. L. J. J.  
Experiment = RVH/362.D na ZB\_extracte  
Sample\_id = CHLOROPFORM-D  
Solvent = CHLOROPFORM-D  
Creation time = 4-MAY-2008 11:53:17  
Revision time = 4-MAY-2008 12:22:48  
Current time = 4-MAY-2008 12:22:48

Data format = 1D COMPLEX  
Dim size = 8192  
Dim title = 1H  
Dim units = [ppm]  
Dimensions = X  
Site = Eclipse+ 300  
Spectrometer = DELTA\_NMR  
Field strength = 7.0586013 [T] (300.13 MHz)  
X\_acq\_duration = 1.8169856 [s]  
X\_domain = 1H  
X\_freq = 300.5296592 [MHz]  
X\_offset = 51 [ppm]  
X\_points = 8192  
X\_prescans = 0  
X\_resolution = 0.55036209 [Hz]  
X\_sweep = 4.5085628 [kHz]  
Mod\_return = FALSE  
Total\_scans = 1  
Scans = 16  
X\_90\_width = 11.3 [us]  
X\_acq\_time = 1.8169856 [s]  
X\_angle = 90 [deg]  
X\_pulse = 11.3 [us]  
Initial\_wait = 1 [s]  
Phase\_preset = 3 [us]  
Recvr\_gain = 10  
Relaxation\_delay = 5 [s]  
Temp\_gat = 19.9 [degC]  
Unblank\_time = 2 [us]

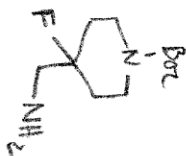

=====

|                 |                                  |            |        |
|-----------------|----------------------------------|------------|--------|
| Injection Date  | : 5/9/08 1:29:26 PM              | Seq. Line  | : 2    |
| Sample Name     | : EVH 362                        | Vial       | : 20   |
| Acq. Operator   | : EVH                            | Inj        | : 1    |
|                 |                                  | Inj Volume | : 1 µl |
| Acq. Method     | : D:\HPCHEM\1\METHODS\SYNTS1A.M  |            |        |
| Last changed    | : 2/12/08 1:33:54 PM by vvh      |            |        |
| Analysis Method | : D:\HPCHEM\1\METHODS\STERVV1A.M |            |        |
| Last changed    | : 5/9/08 1:25:49 PM by EVH       |            |        |
|                 | (modified after loading)         |            |        |

METHOD FOR STEROL DETERMINATION

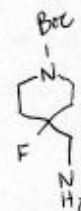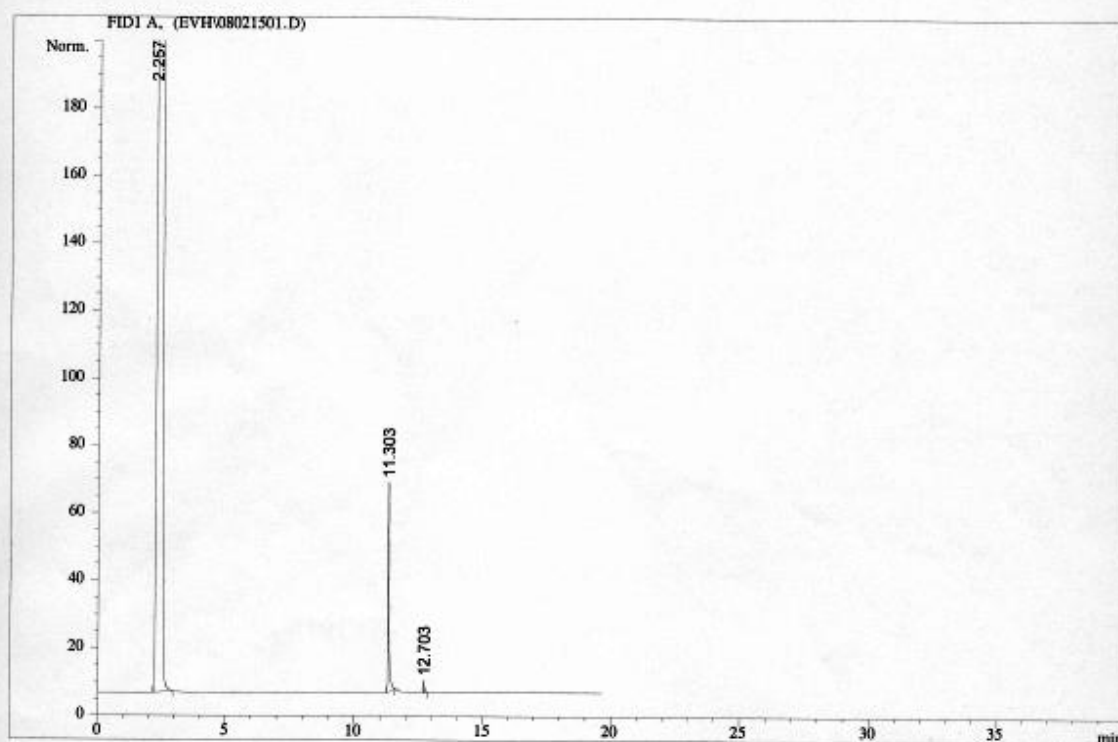

=====  
Area Percent Report  
=====

|                      |   |                     |
|----------------------|---|---------------------|
| Sorted By            | : | Signal              |
| Calib. Data Modified | : | 5/10/00 10:31:33 AM |
| Multiplier           | : | 1.0000              |
| Dilution             | : | 1.0000              |

Signal 1: FID1 A,

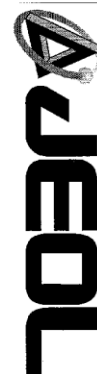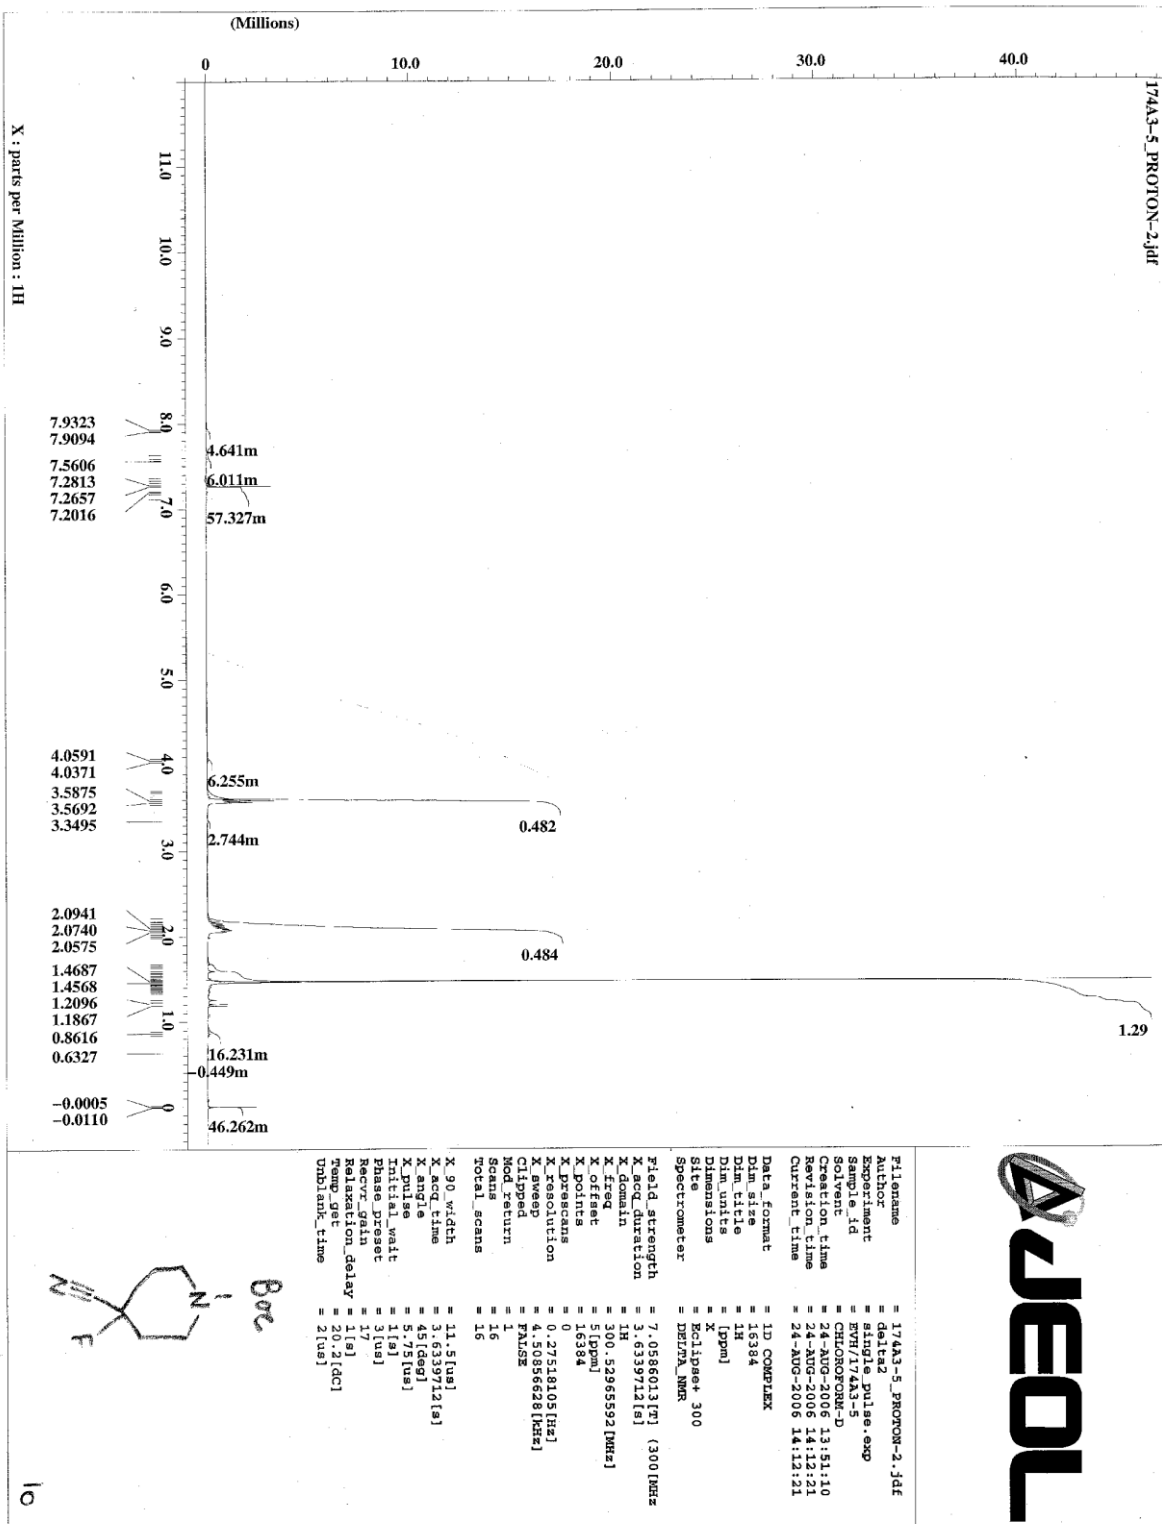

File : C:\MSDCHEM\1\DATA\EVH 176.D  
Operator : FVL  
Acquired : 14 Sep 2006 19:15 using AcqMethod Synthese.M  
Instrument : Instrument #1  
Sample Name:  
Misc Info :  
Vial Number: 16

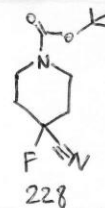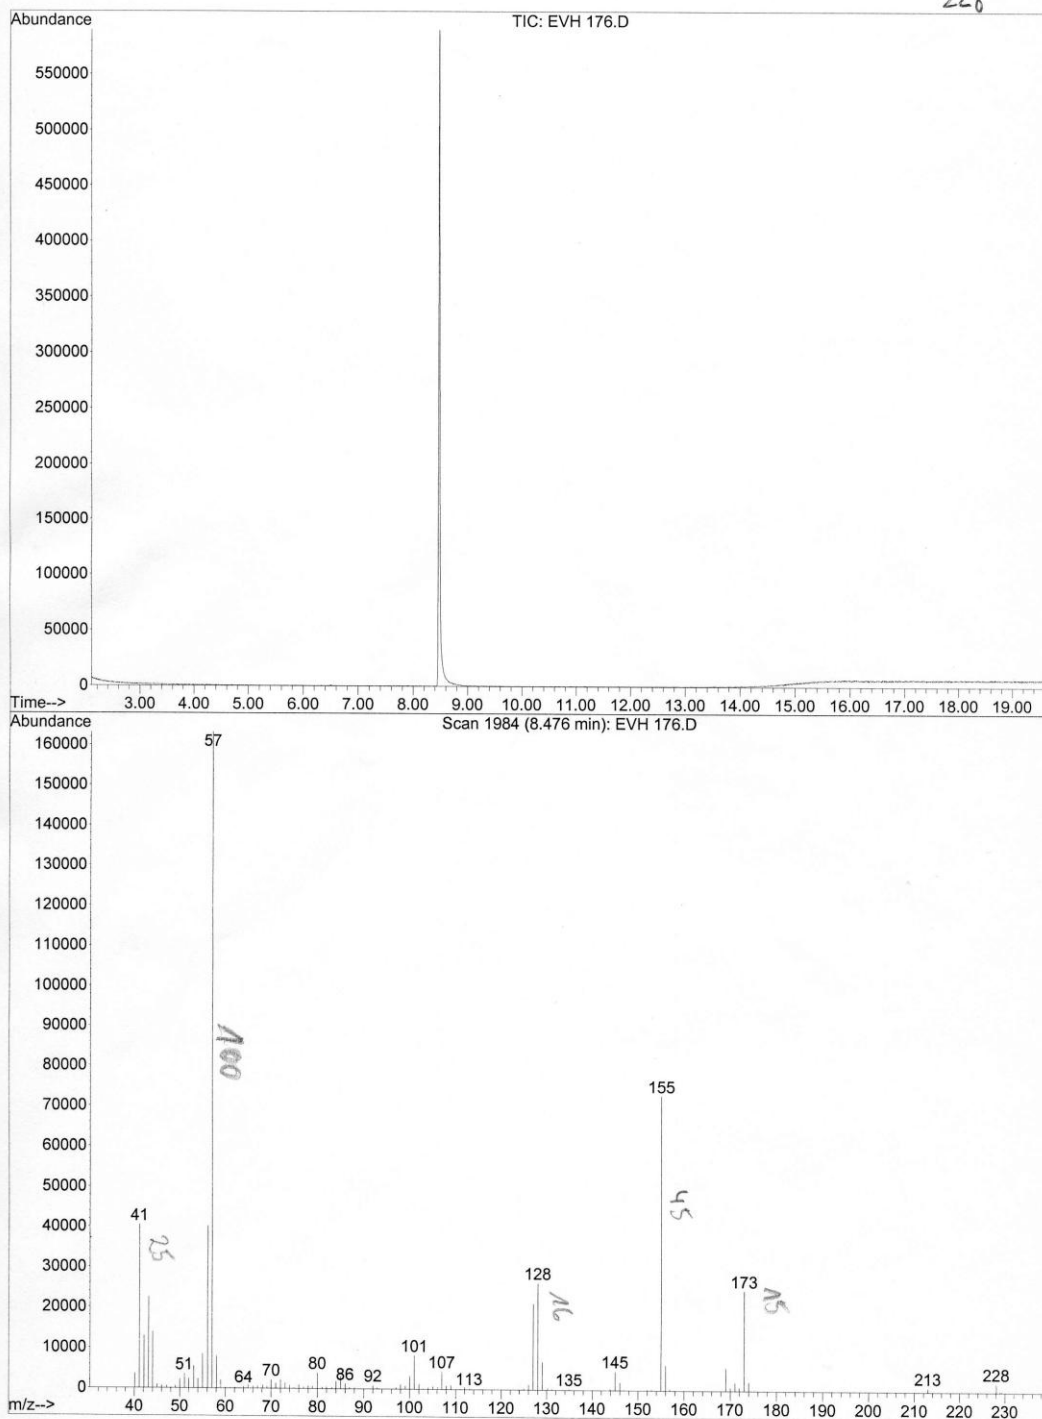

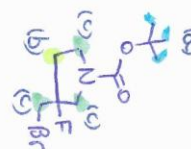

## Current Chromatogram(s)

FID1 A, (KP-STEROL 2009-01-22 08-56-33 090121000106.D)

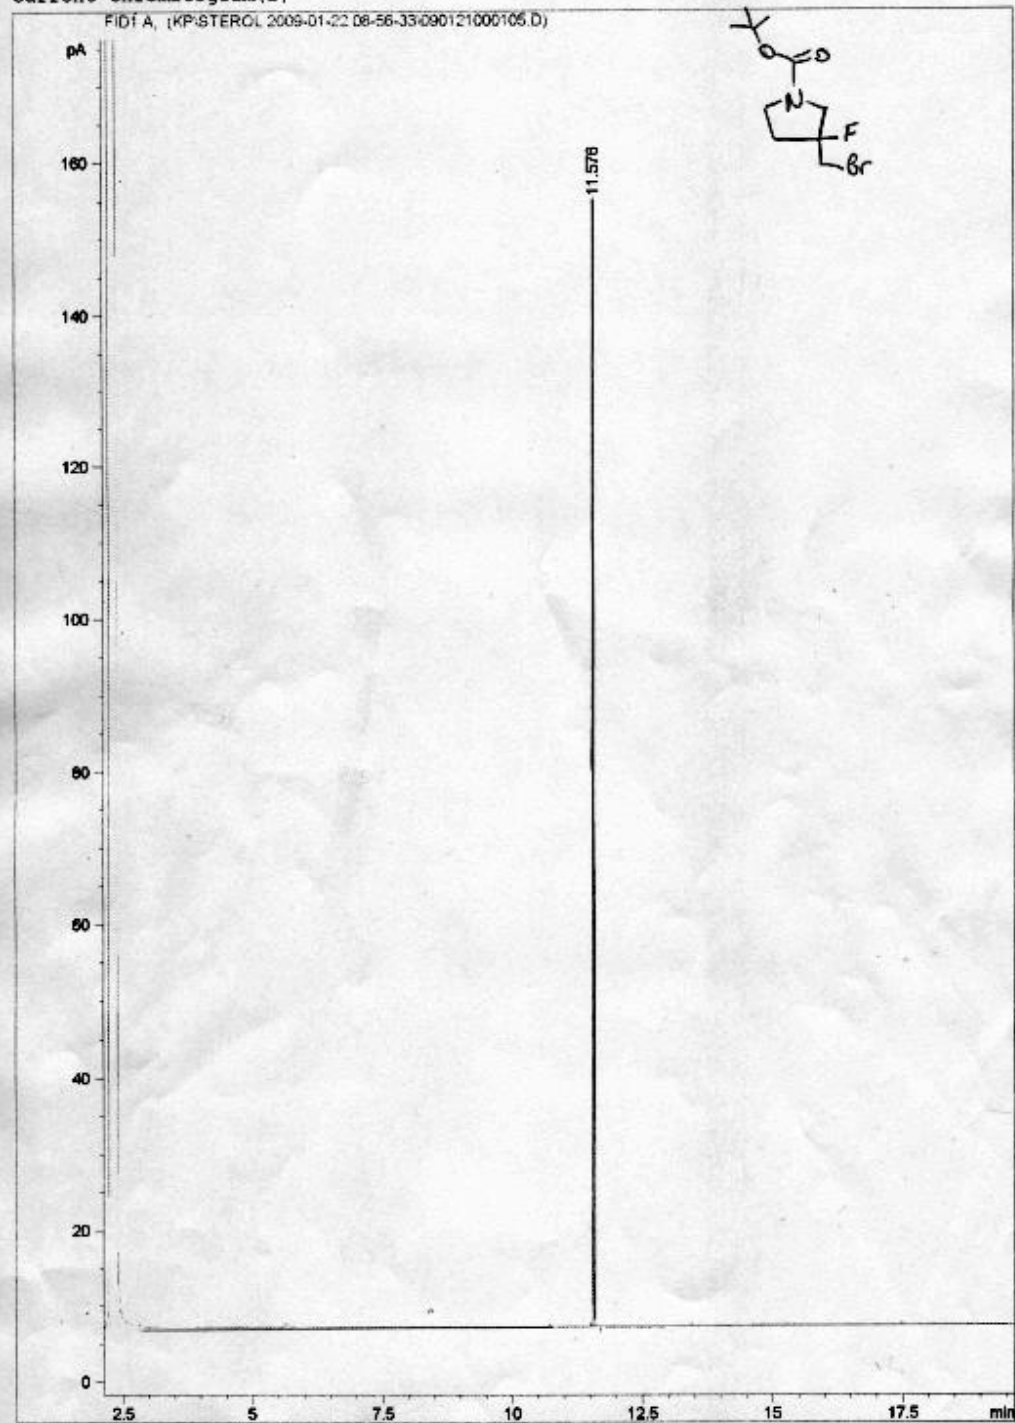

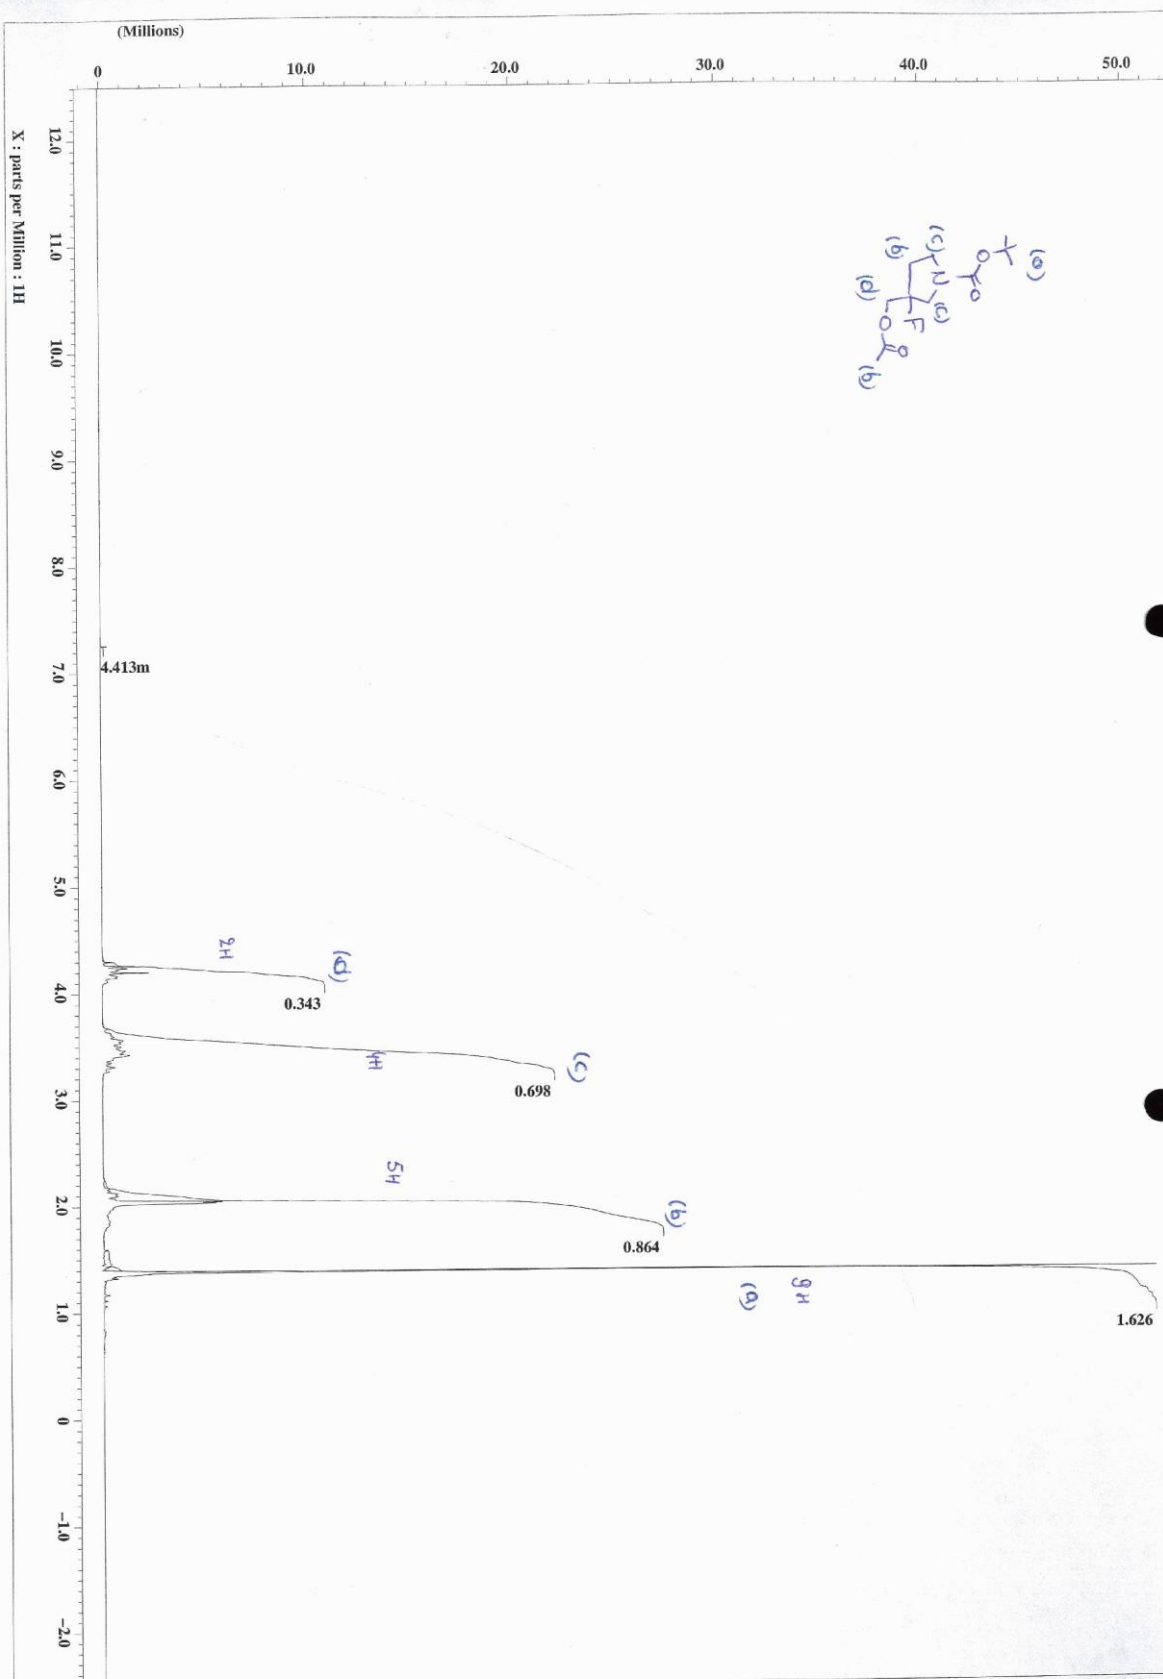



Current Chromatogram(s)

FID1 A, (GCRUNICYDEX-AA 2010-03-23 09:51:27(KP-39T.D))

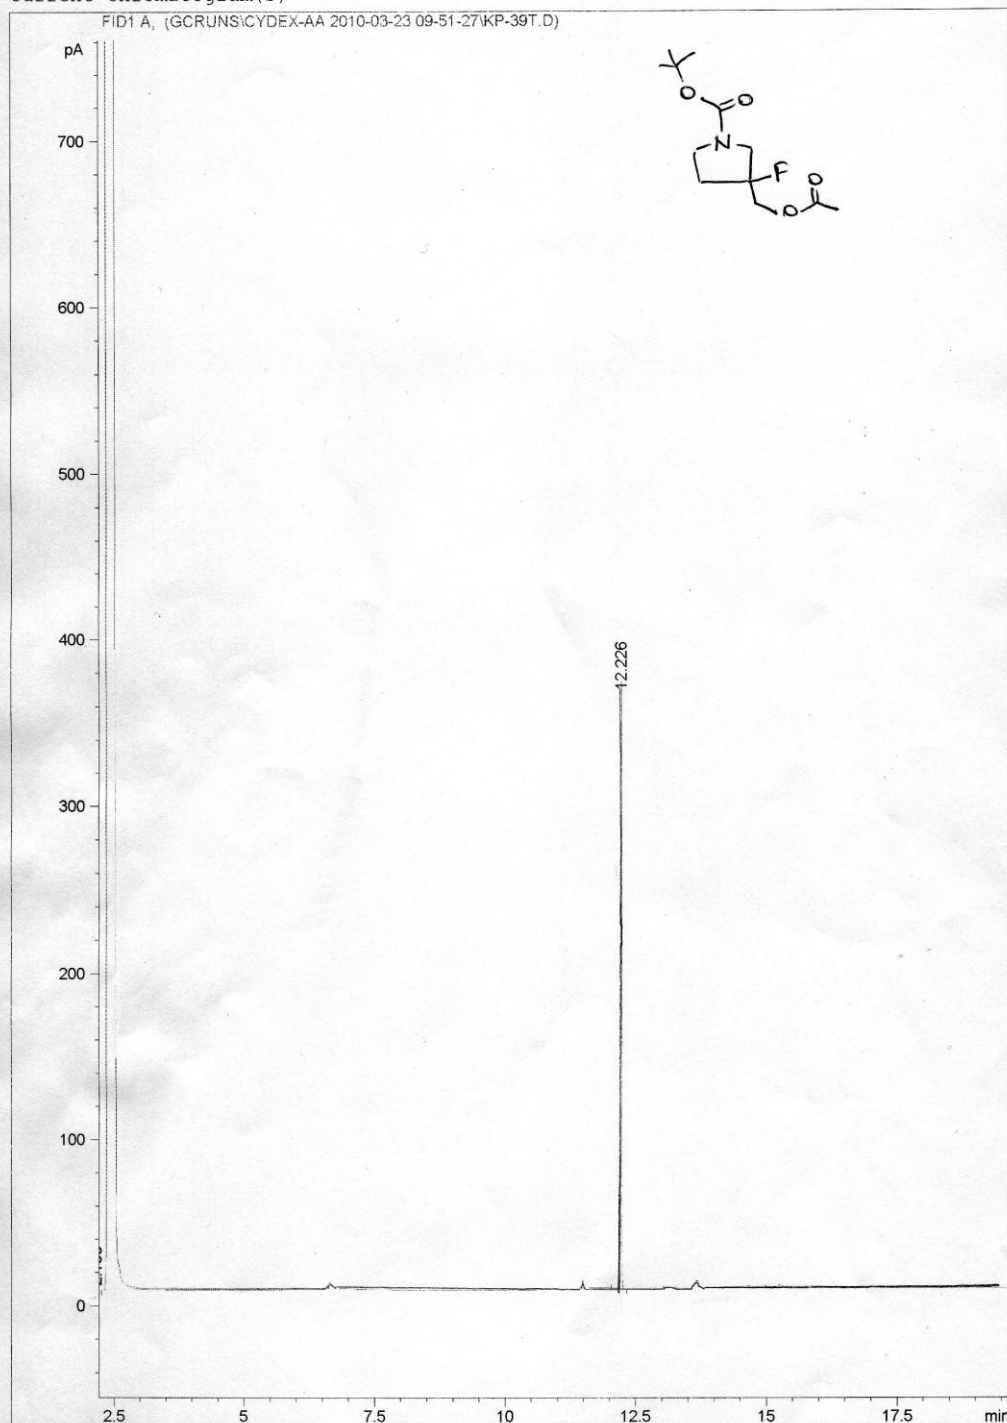

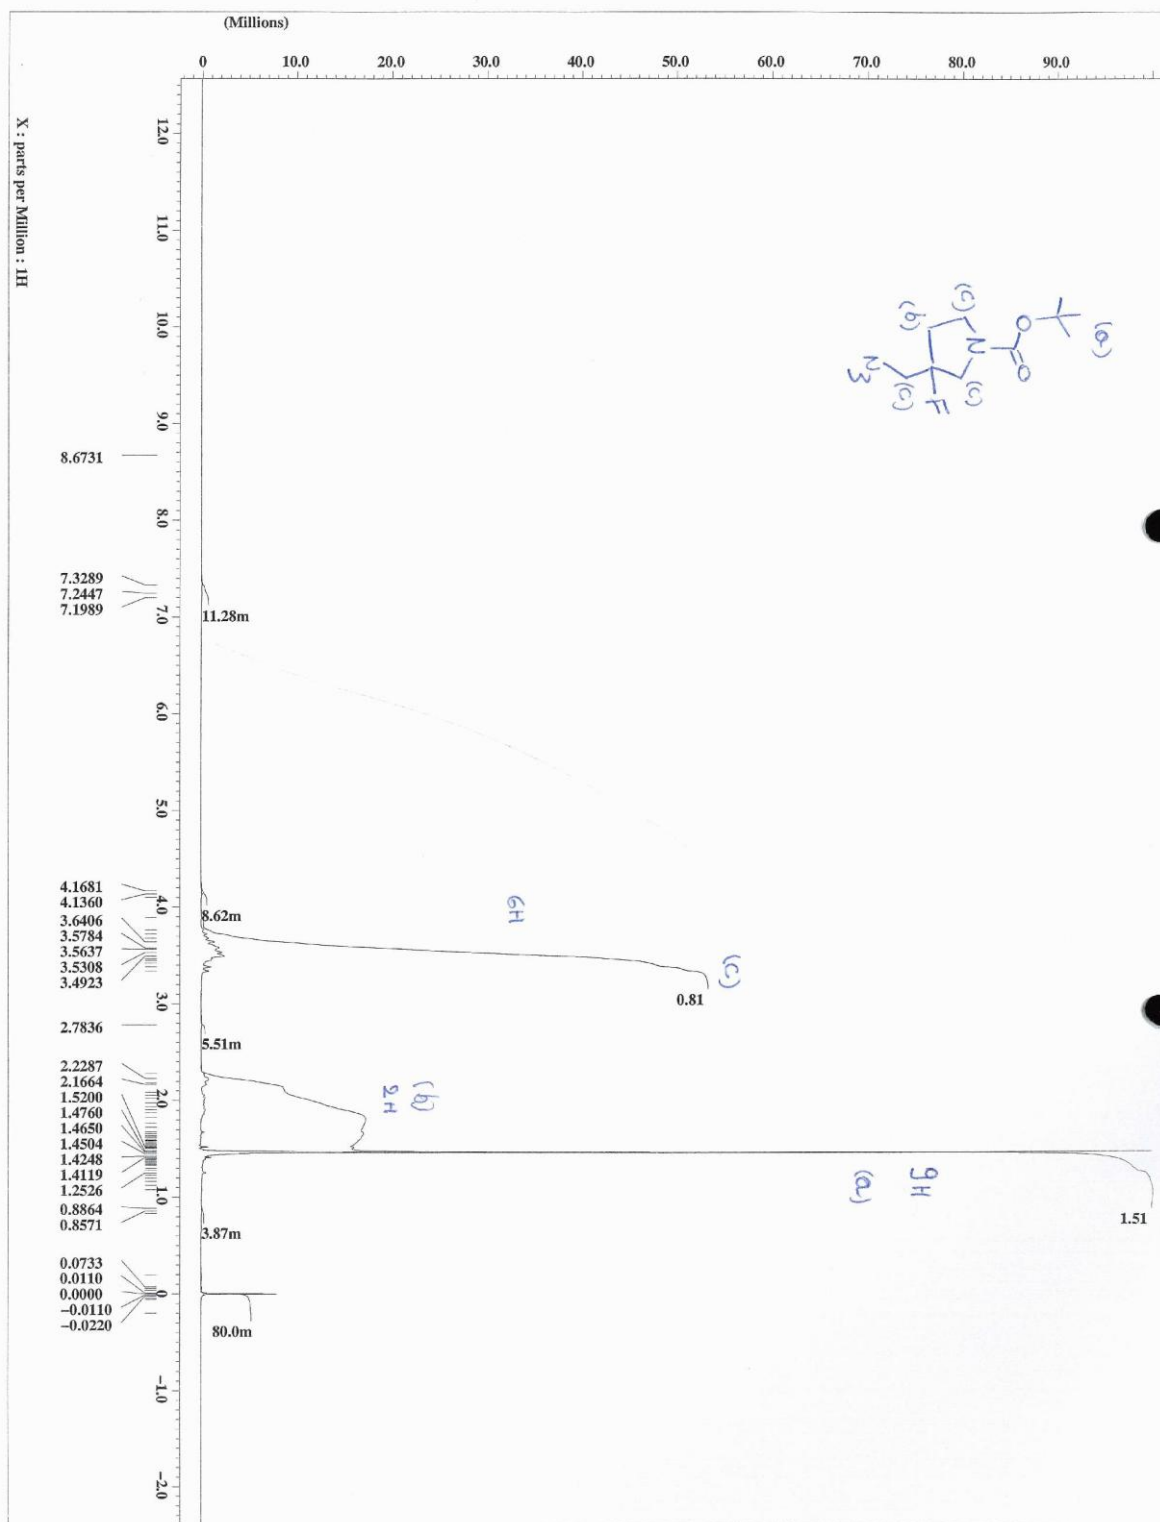

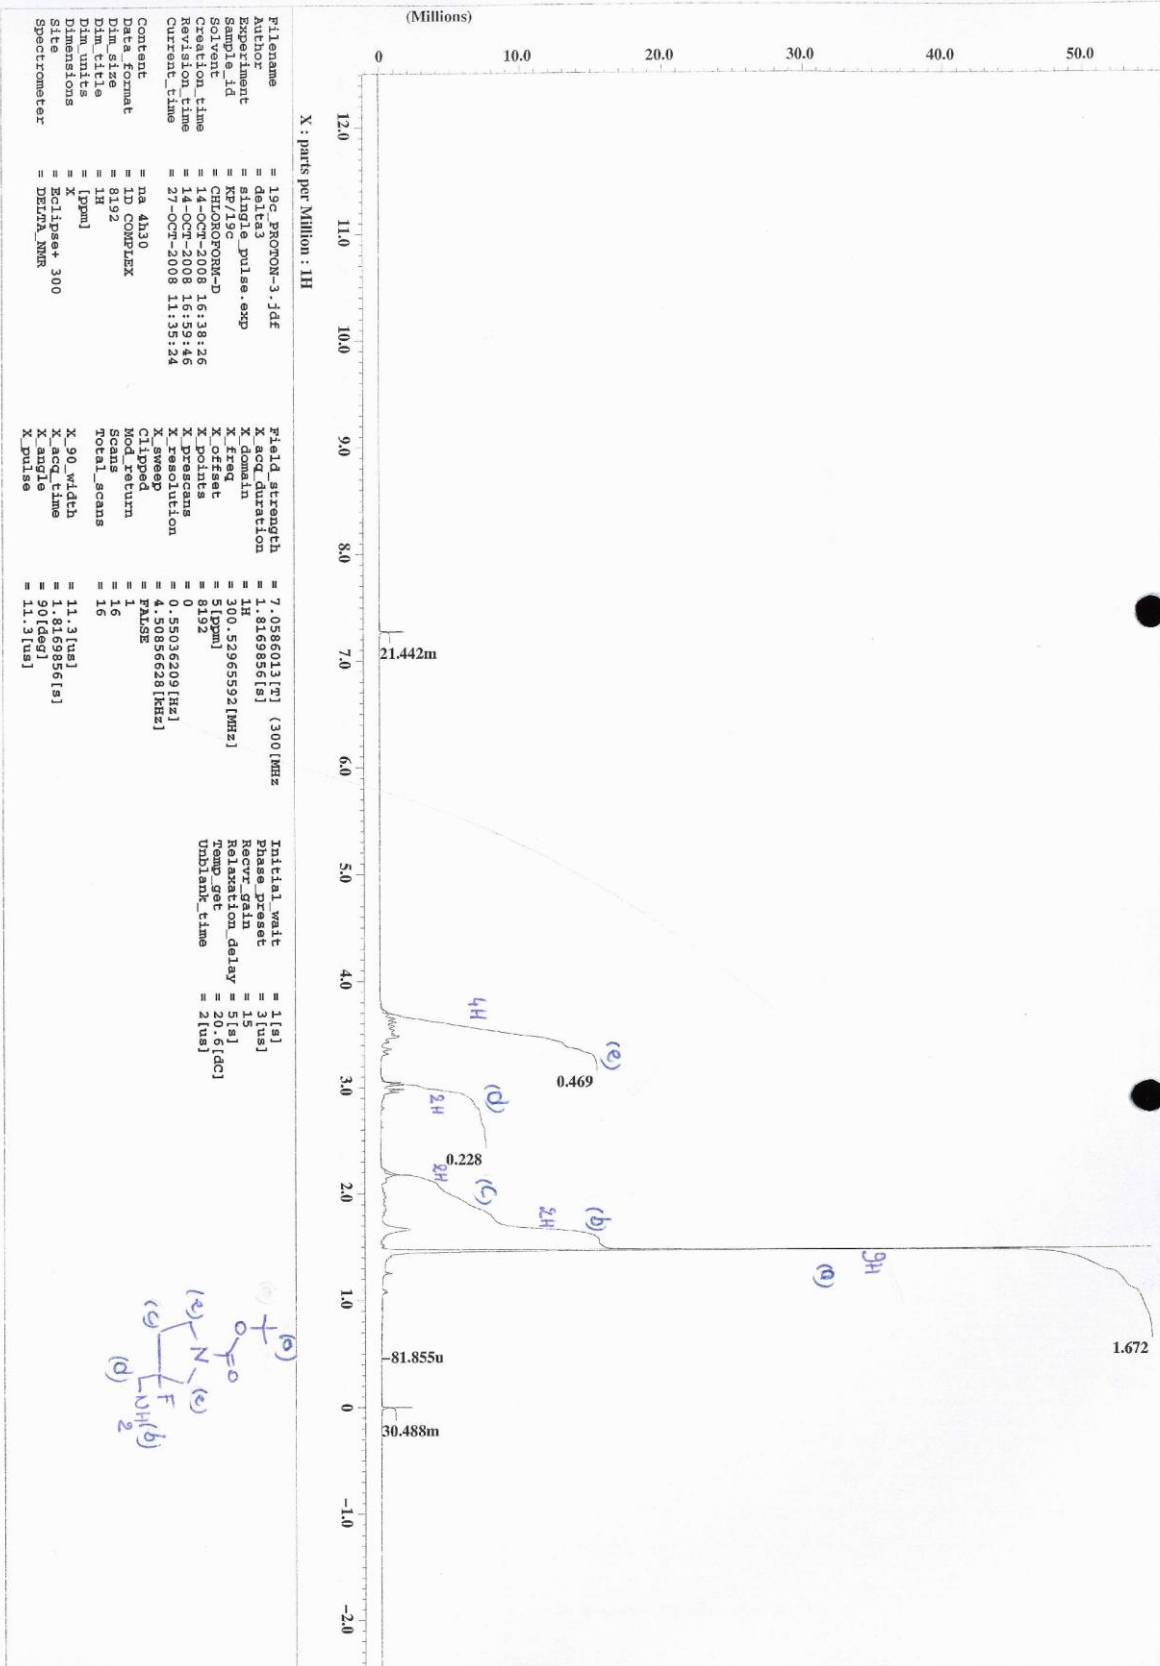

20a

File : D:\GCMS-data\synthese\KP19c.D  
Operator : AA  
Acquired : 20 Oct 2008 13:51 using AcqMethod Synthese.M  
Instrument : Instrument #1  
Sample Name:  
Misc Info :  
Vial Number: 7

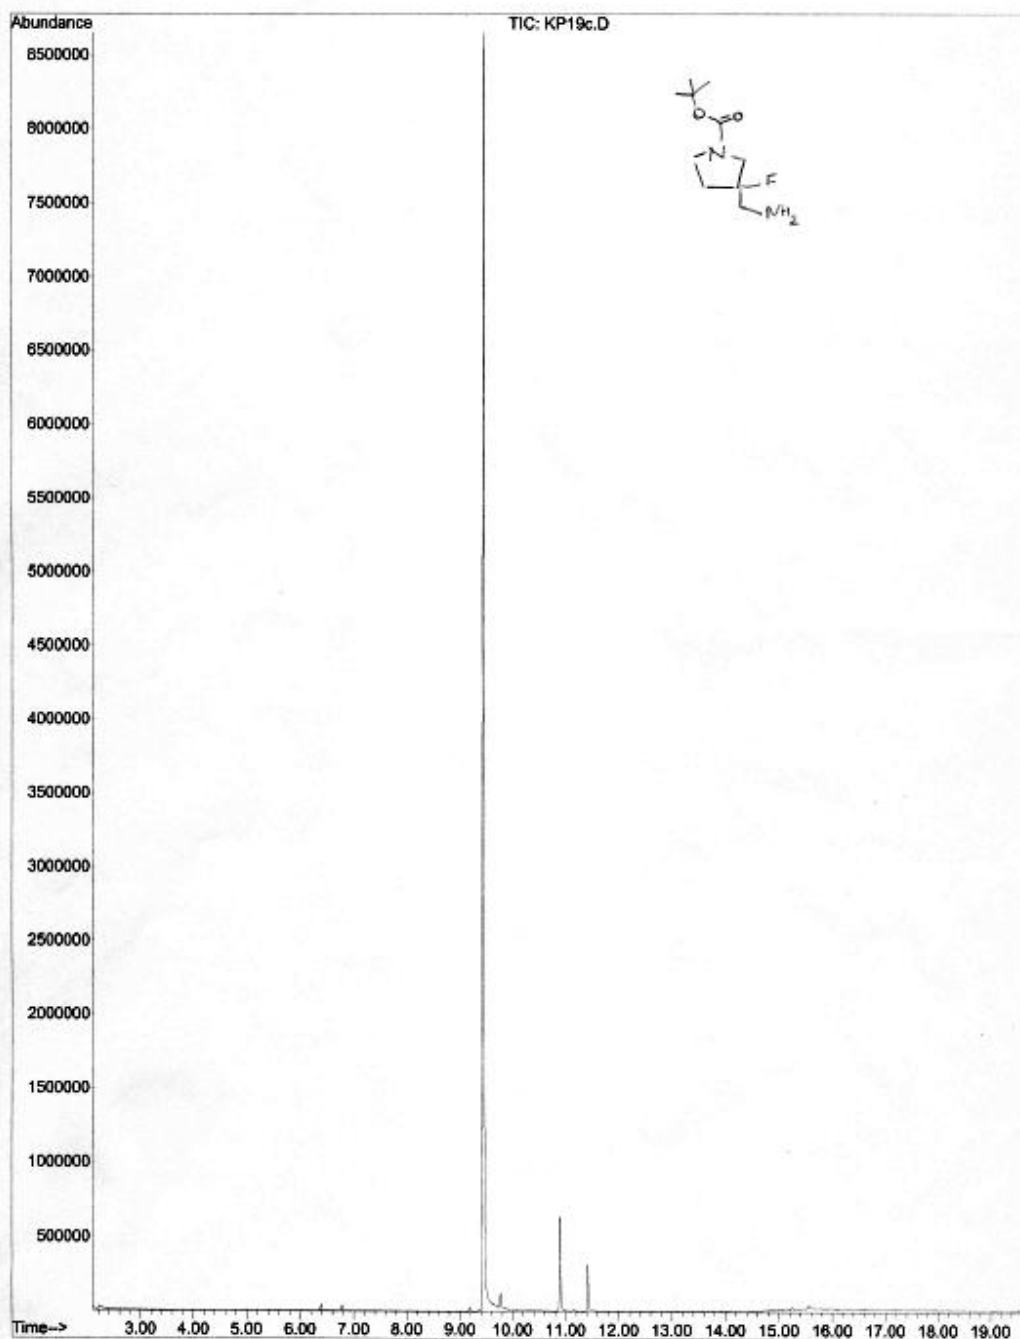

```

Filename      = 21a_PROTON-7.jdf
Author        =
Experiment    = single_pulse.exp
Sample_id     = RP/21a
Solvent       = CH2Cl2/PROTON-D
Acquisition_time = 7-NOV-2008 16:35:59
Revision_time  = 12-NOV-2008 14:08:52
Current_time   = 12-NOV-2008 14:09:02

Data_format    = 1D COMPLEX
Dim_size       = 8192
Dim_title      = 1H
Dim_units      = [ppm]
Dimensions     = X
Site           = Eclipser 300
Spectrometer   = DELTA_NMR

Field_strength = 7.0586013[T] (300 MHz)
X_acq_duration = 1.8169856[s]
X_domain       = 300.52965592[MHz]
X_freq         = 51ppm]
X_offset       = 8192
X_points       = 0
X_prescans     = 0.55036209[Hz]
X_resolution   = 4.50856528[Hz]
X_sweep        = FALSE
Mod_return     = 1
Scans          = 16
Total_scans    = 16

X_90_width     = 11.3[us]
X_acq_time     = 1.8169856[s]
X_angle        = 20[deg]
X_coupling     = 11[us]
X_decay        = 11[us]
X_wait         = 3[us]
phase_delay    = 8
Relaxation_delay = 5[s]
Temp_get       = 20.1[degC]
Unblank_time   = 2[us]
  
```

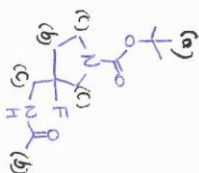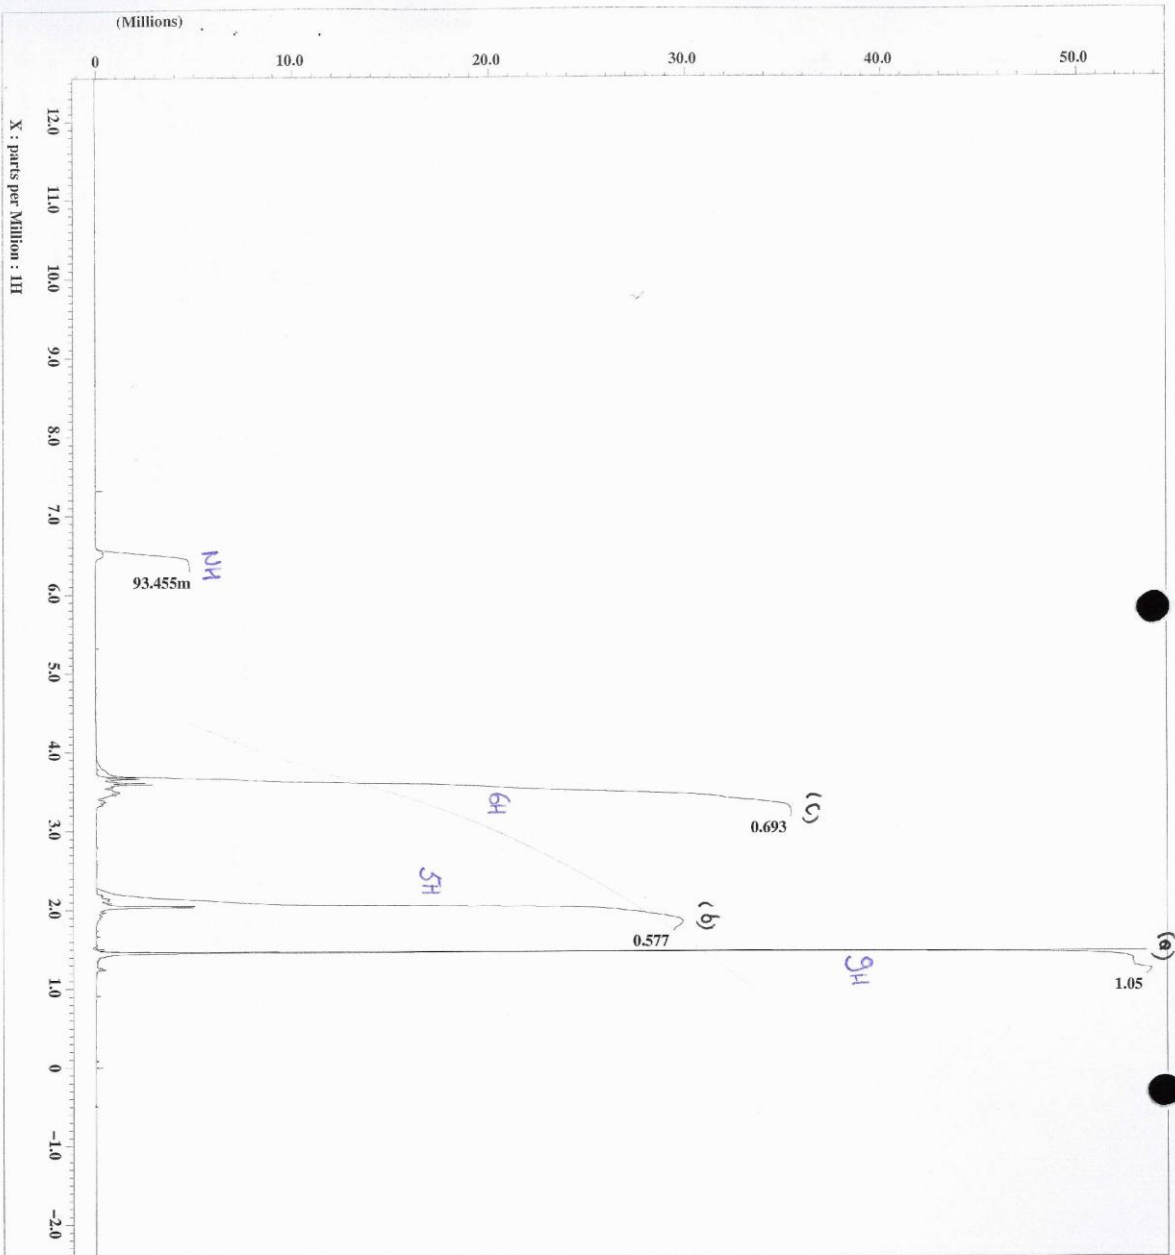

Current Chromatogram(s)

FID1 A, (KP:STEROL 2008-10-22 15-25-22:081022000002.D)

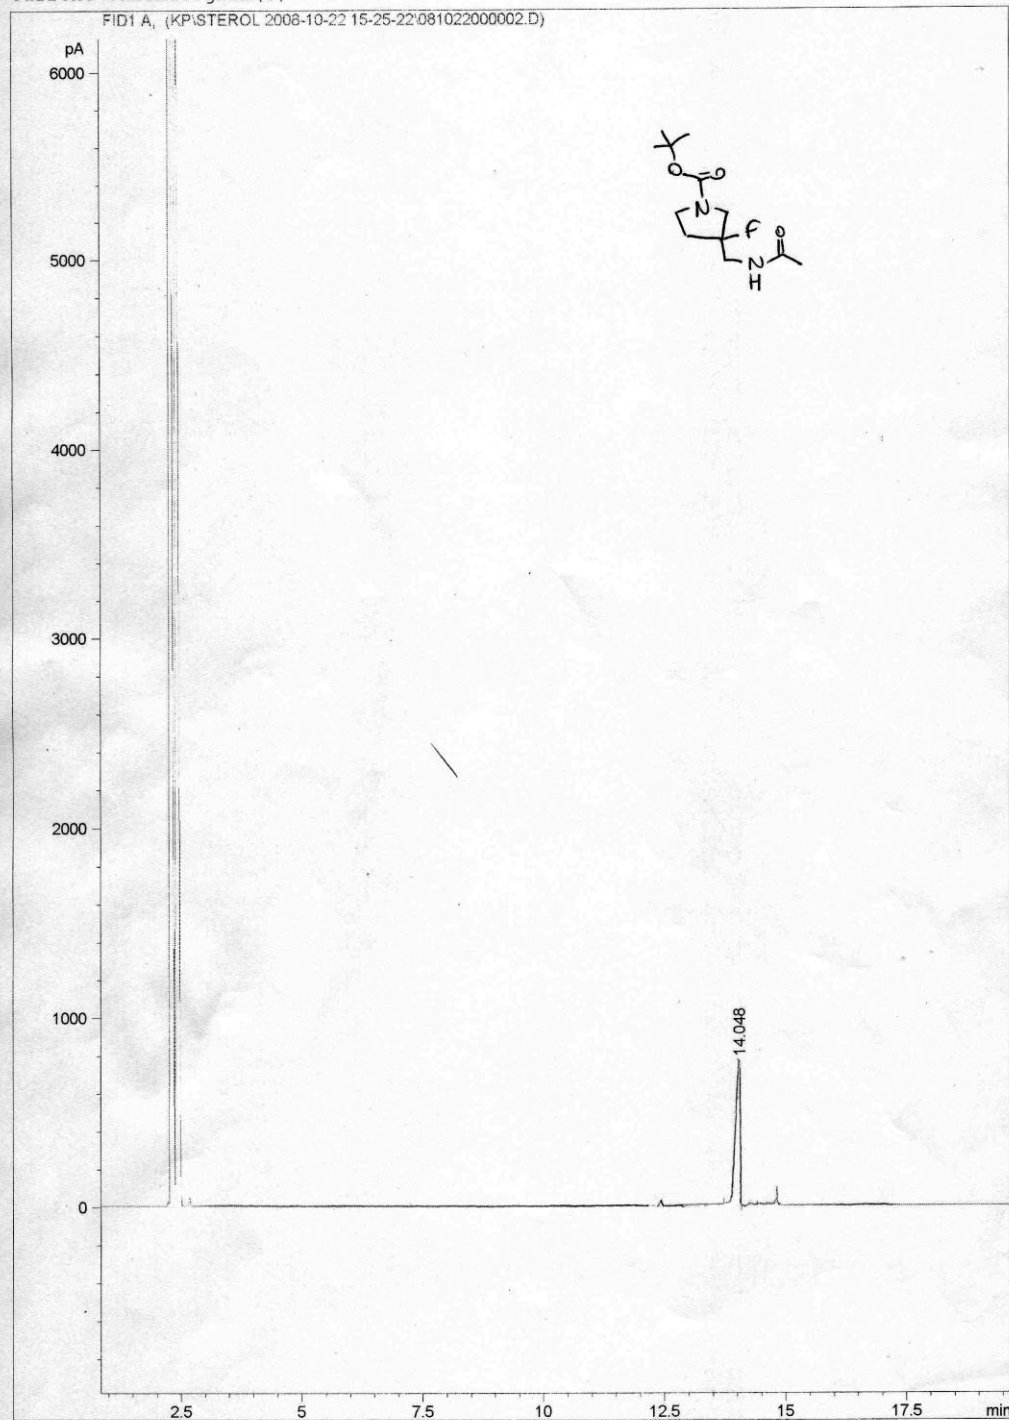



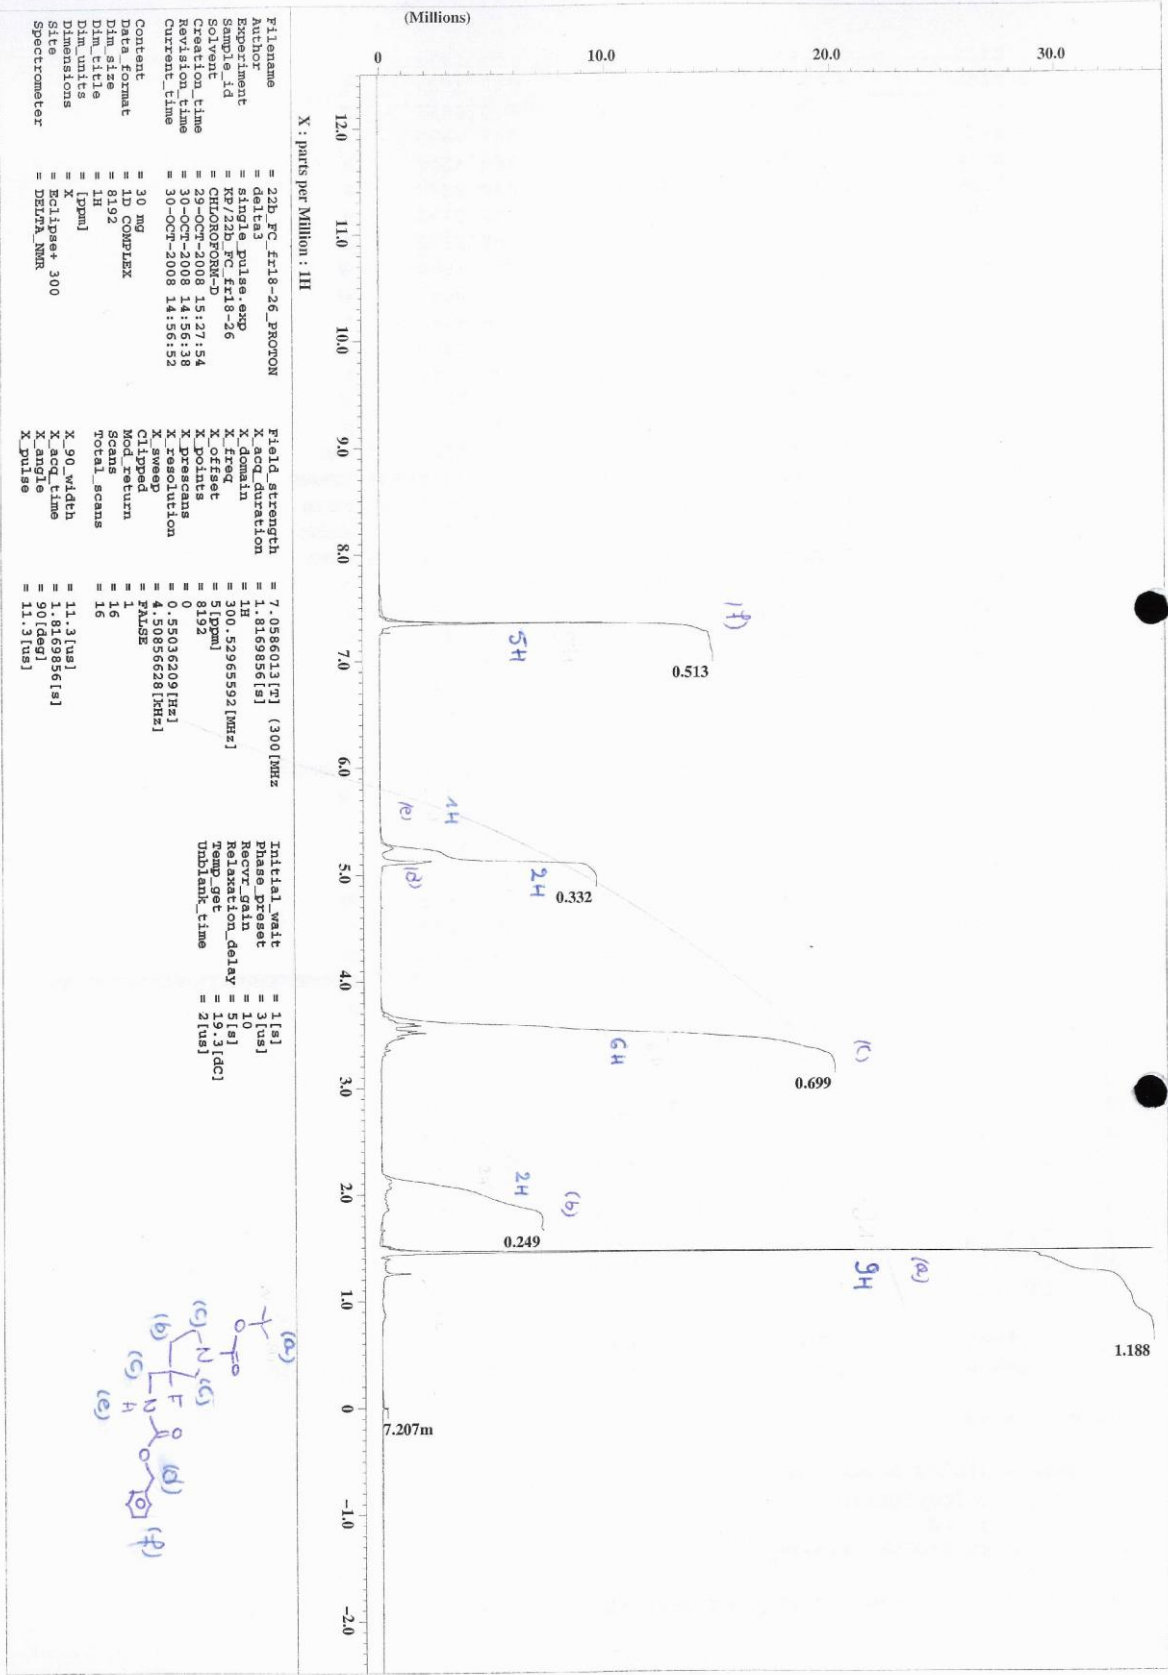

20c

Print of window 38: Current Chromatogram(s)

Injection Date : 11/7/2008 1:25:54 PM Seq. Line : 3  
 Sample Name : KP/22b Location : Vial 5  
 Acq. Operator : PZ Inj : 1  
 Inj Volume : 20 µl  
 Acq. Method : D:\1\METHODS\RPLMSYAC.M  
 Last changed : 8/1/2008 2:46:54 PM by PZ  
 Analysis Method : D:\1\METHODS\RPSYACLF.M  
 Last changed : 3/18/2009 9:49:58 AM by vvvh  
 methode RP-LCMS voor synthesestalen

20c

Current Chromatogram(s)

DAD1 A, Sig=220,8 Ref=360,100 (E:\081107\005-0301.D)

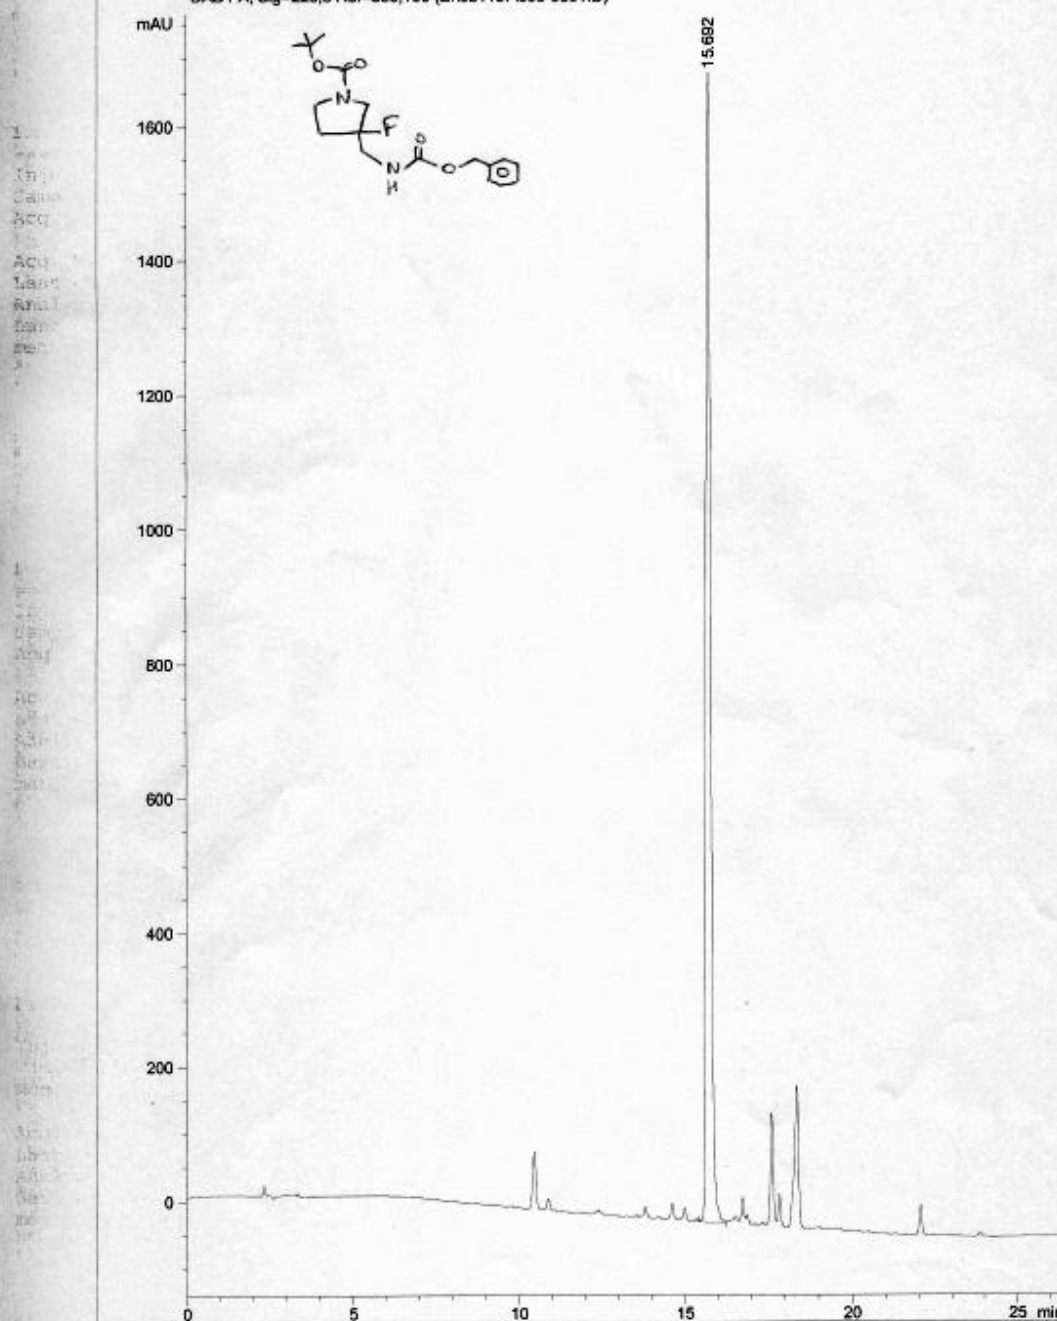



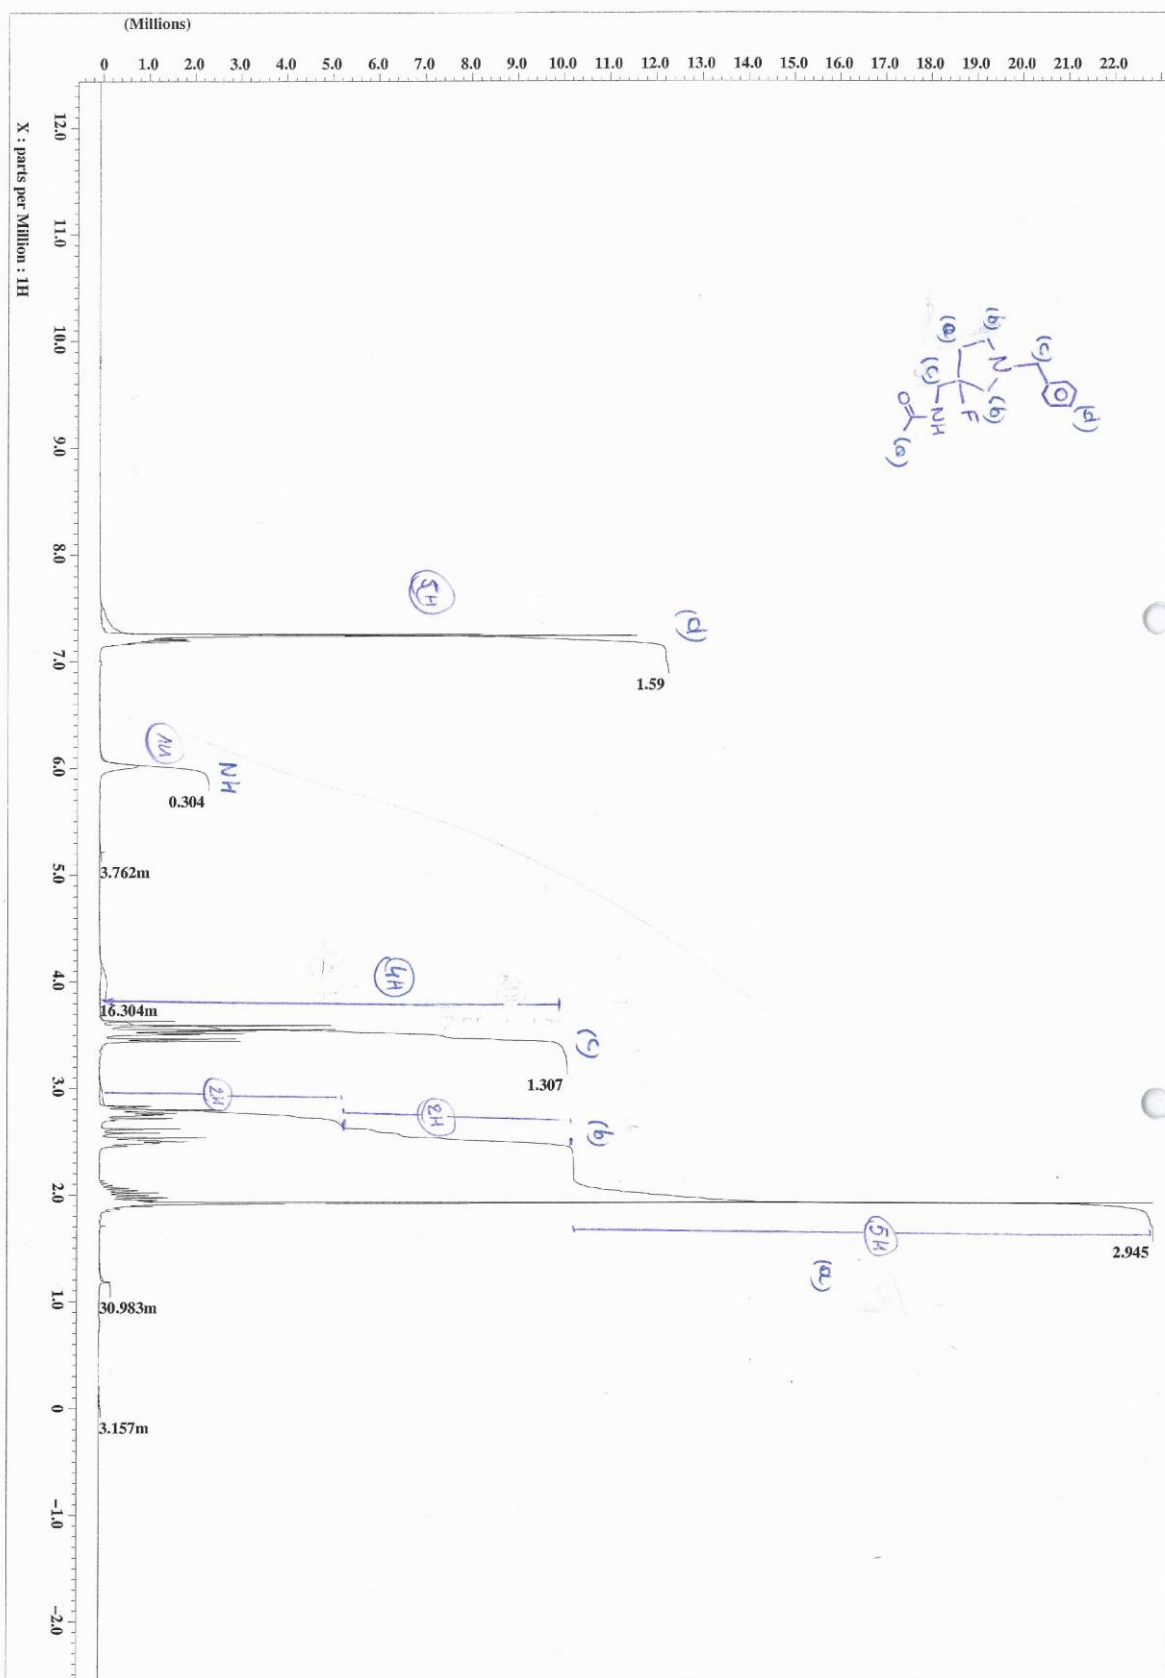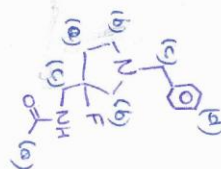

20d  
==

File : D:\GCMS-data\synthese\KP35b.D  
Operator : AA  
Acquired : 10 Feb 2009 13:41 using AcqMethod Synthese.M  
Instrument : Instrument #1  
Sample Name:  
Misc Info :  
Vial Number: 7

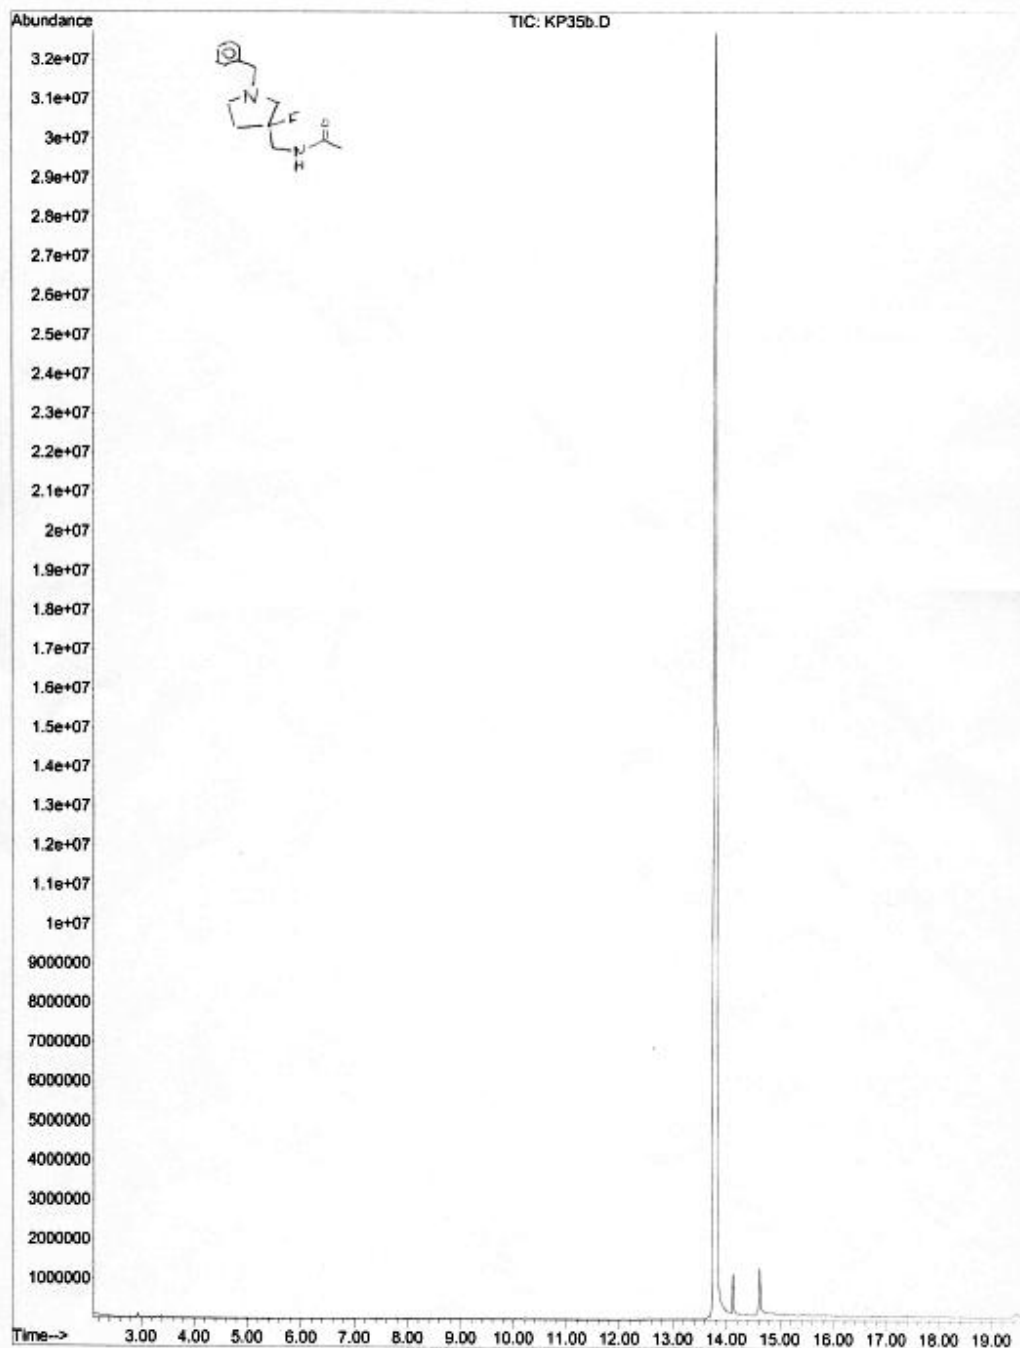

# JEOL

Filename = 32\_PROTON-22.fid  
 Author =  
 Experiment = single\_pulse.exp  
 Sample\_id = RP/32  
 Solvent = D2O  
 Creation\_time = 11-FEB-2009 01:23:46  
 Revision\_time = 11-FEB-2009 18:01:31  
 Current\_time = 20-FEB-2009 18:01:37  
 Data\_format = 1D COMPLEX  
 Dim\_size = 8192  
 Dim\_title = 1H  
 Dim\_units = [ppm]  
 Dimensions = X  
 Site = X  
 Spectrometer = DELTA-300  
 Field\_strength = 7.0586013 [T] (300 MHz)  
 X\_acq\_duration = 1.8169856 [s]  
 X\_domain = 1H  
 X\_freq = 300.52965592 [MHz]  
 X\_offset = 8192  
 X\_points = 8192  
 X\_prescans = 0  
 X\_resolution = 0.55036209 [Hz]  
 X\_sweep = 4.5085628 [kHz]  
 Clipped = FALSE  
 Mod\_return = 1  
 Scans = 16  
 Total\_scans = 16  
 X\_90\_width = 11.3 [us]  
 X\_acq\_time = 1.8169856 [s]  
 X\_angle = 90 [deg]  
 X\_pulse = 11.3 [us]  
 Initial\_wait = 1 [us]  
 Pulse\_wait = 1 [us]  
 Recv\_gain = 1 [us]  
 Relaxation\_delay = 399.7 [dc]  
 Ramp\_get = 2 [us]  
 Unblank\_time = 2 [us]

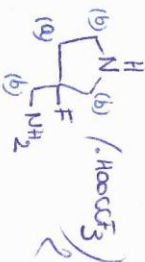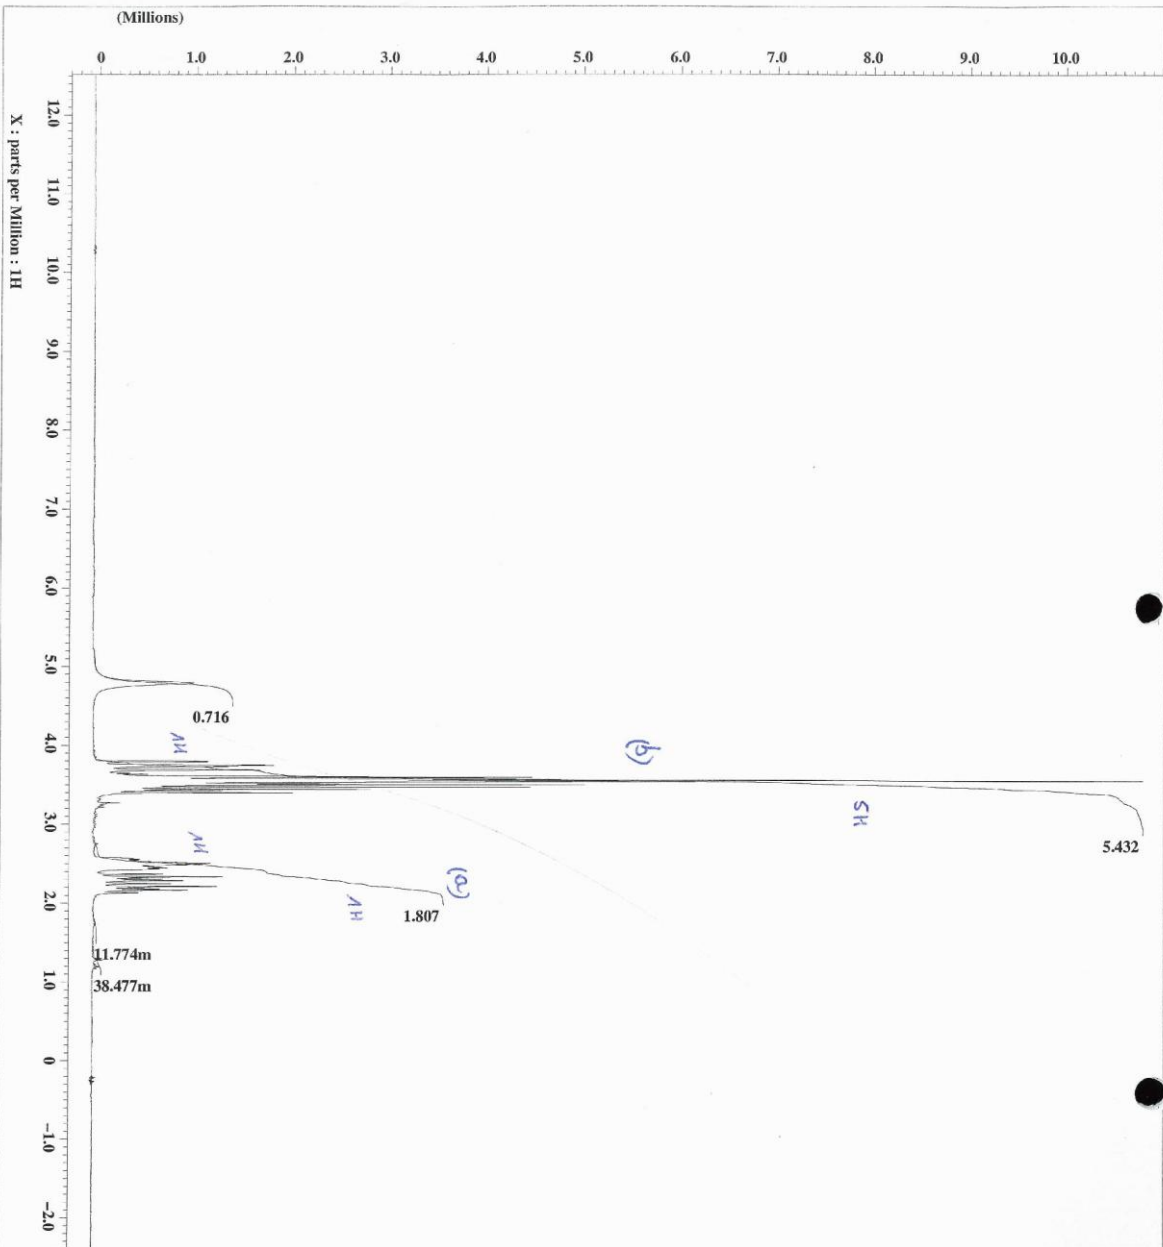

Supplement: c003380d.pdf [file c003380d.pdf]
